# Supplementary material for: Identification and Characterisation of Pseudomonas savastanoi pv. savastanoi as the Causal Agent of Olive Knot Disease in Croatian, Slovenian and Portuguese Olive (Olea europaea L.) Orchards
Source: Plants (Basel). 2023 Jan 9;12(2):307. doi: 10.3390/plants12020307 (PMC9865541; doi:10.3390/plants12020307)
Supplement: Supplementary file 1 [file plants-12-00307-s001.zip]

Archive with 7 entries (7 files):
- Figure S1. Amplification plots of positive Pss isolates from Croatia and Portugal.pdf
- Figure S2. Gel electrophoresis of End Point PCR identified Pss isolates from Slovenia.pdf
- Figure S3. Bichemical and physiological characteristics of Pss isolates.pdf
- Figure S4. Colony morphology of tested Pss isolates.pdf
- Supplementary  S1. Slovenian PCR positive Pss isolates confirmed using mass spectrometry.pdf
- Table S1. Bacteria strains isolated from olive knots in Slovenia identified using mass spectrometry.pdf
- Table S2. Characterisation of molecularly identified Pss isolates.pdf
