# Supplementary material for: Identification and Characterisation of Pseudomonas savastanoi pv. savastanoi as the Causal Agent of Olive Knot Disease in Croatian, Slovenian and Portuguese Olive (Olea europaea L.) Orchards
Source: Plants (Basel). 2023 Jan 9;12(2):307. doi: 10.3390/plants12020307 (PMC9865541; doi:10.3390/plants12020307)
Supplement: Supplementary file 1 [file plants-12-00307-s001.zip › Figure S1. Amplification plots of positive Pss isolates from Croatia and Portugal.pdf]

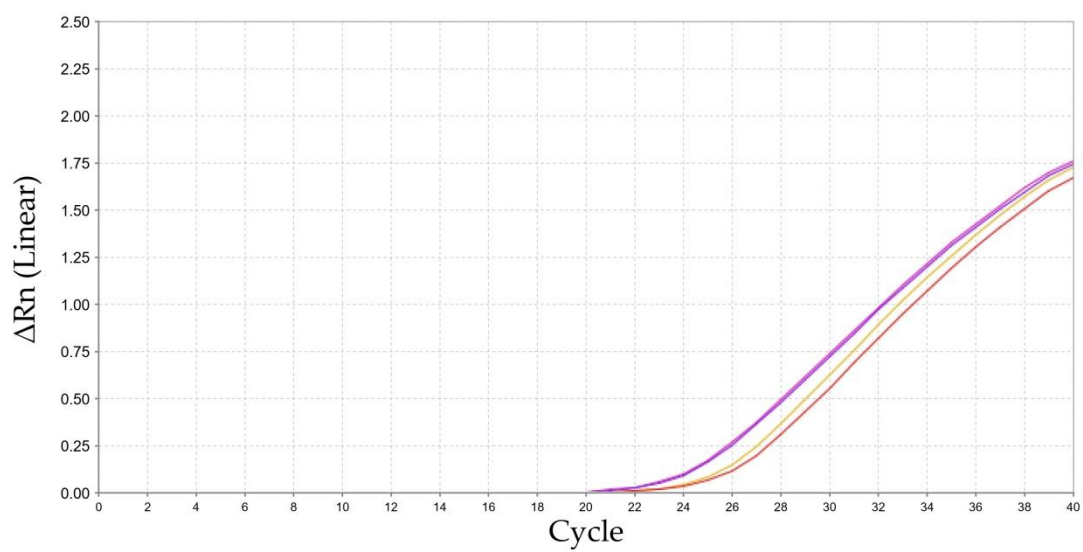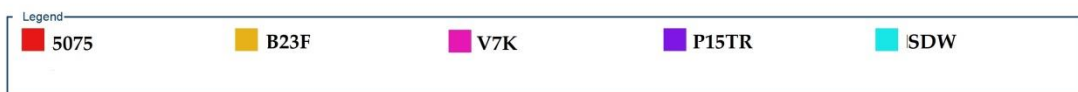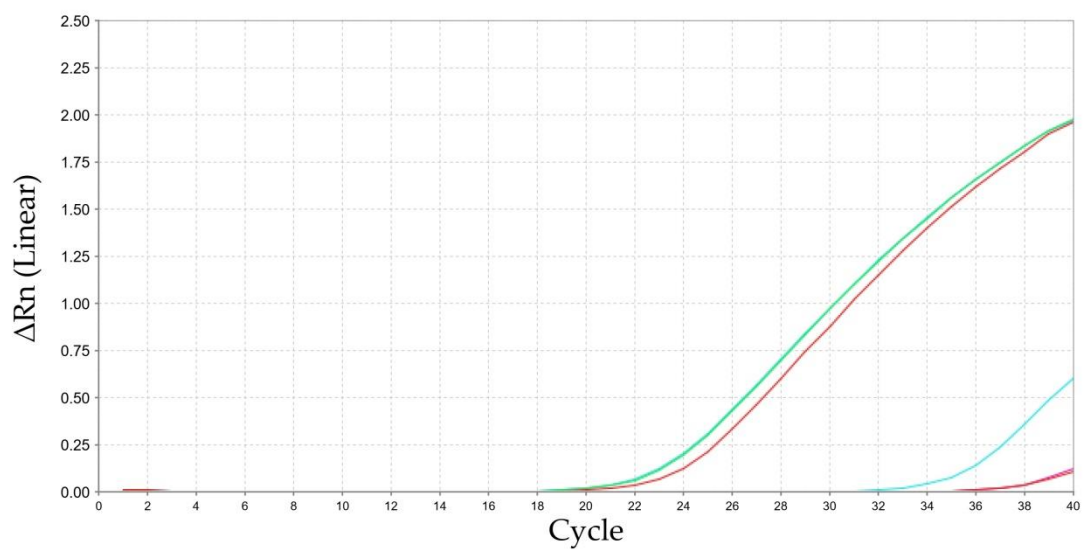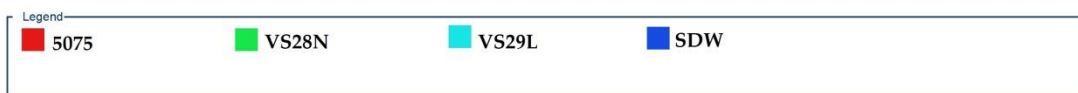

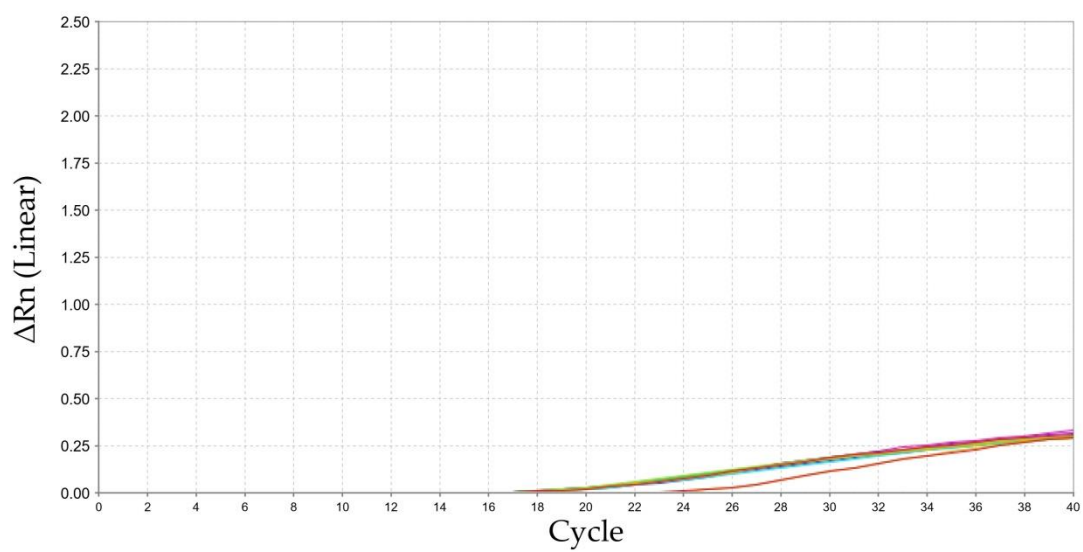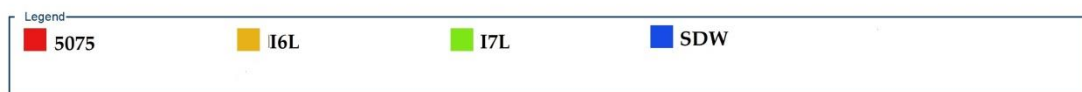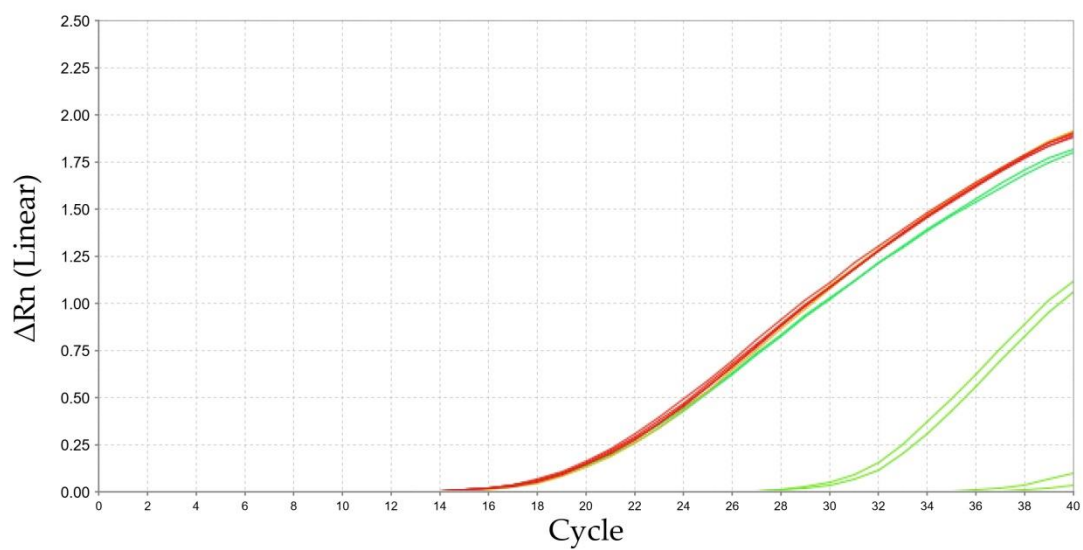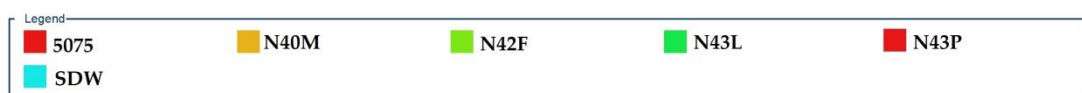

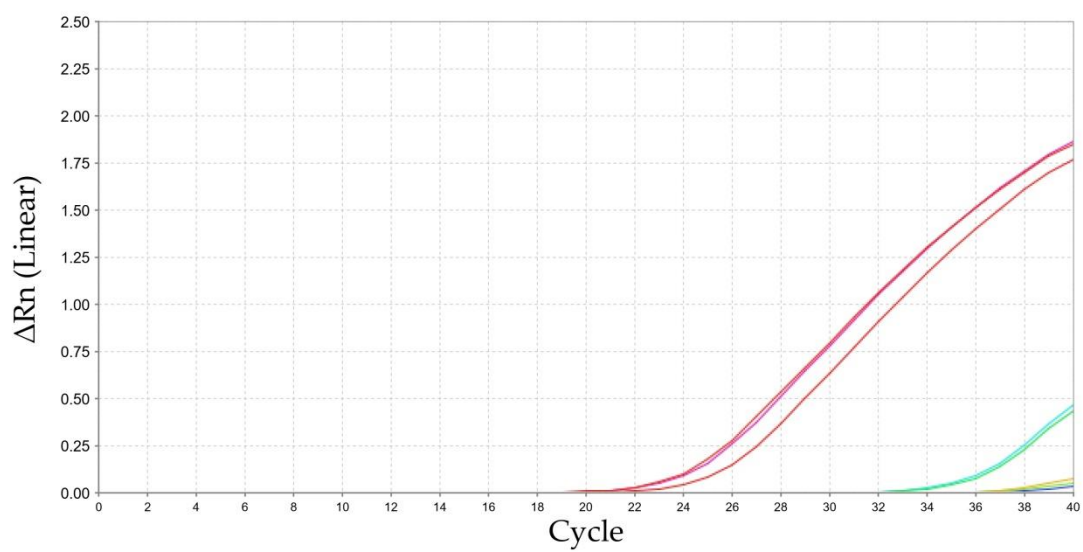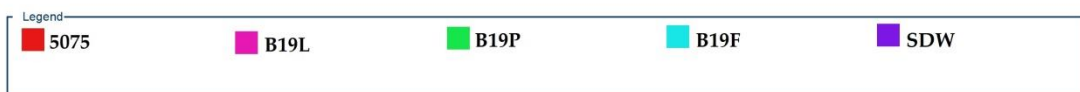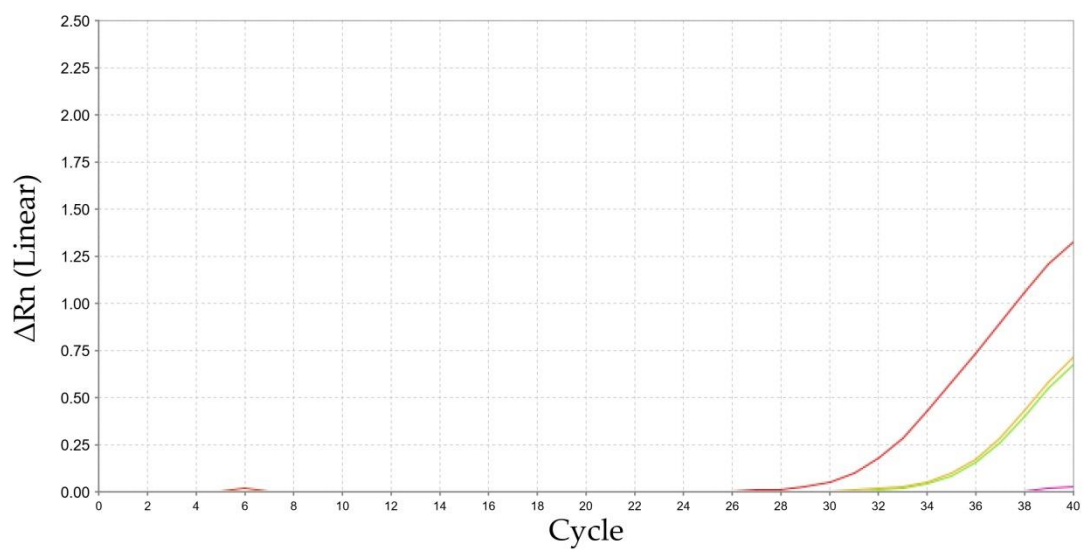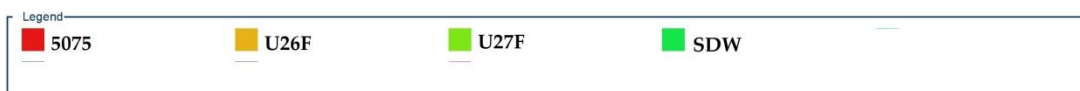

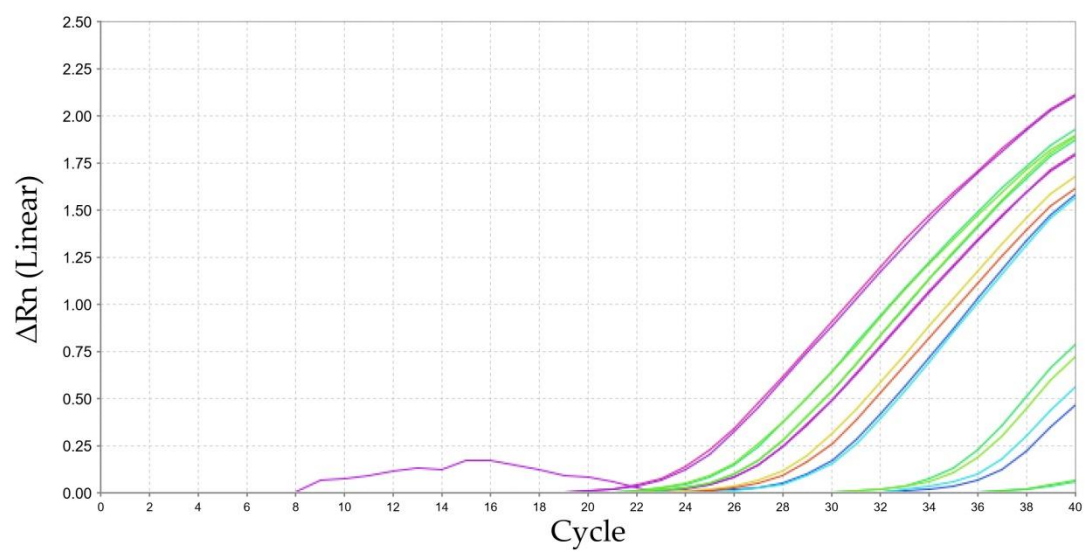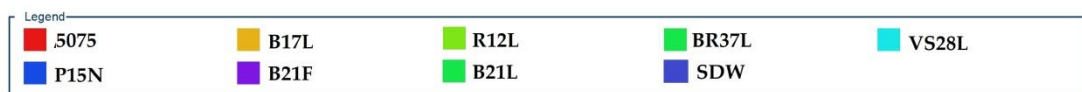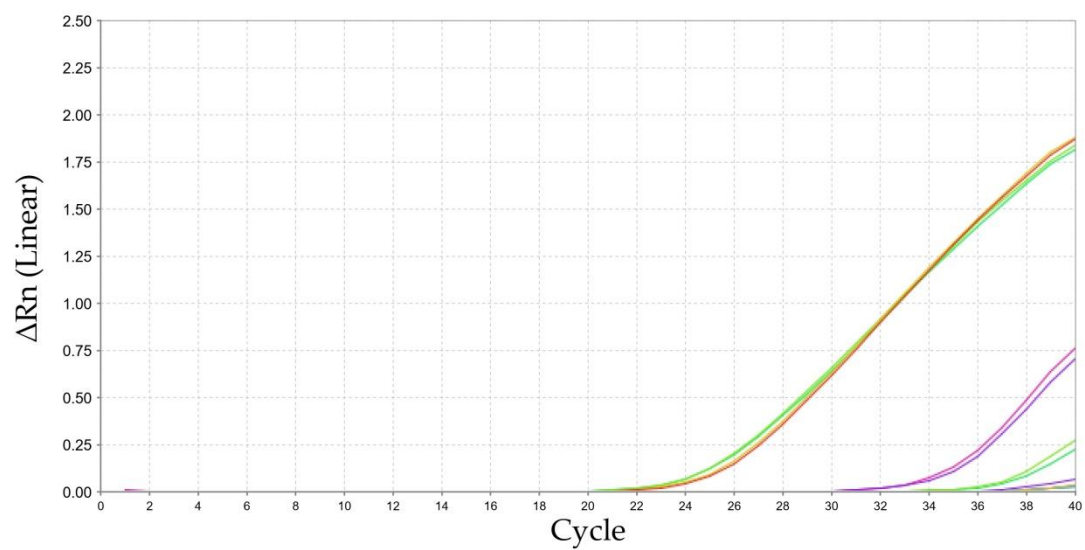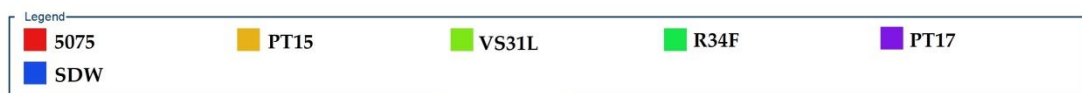

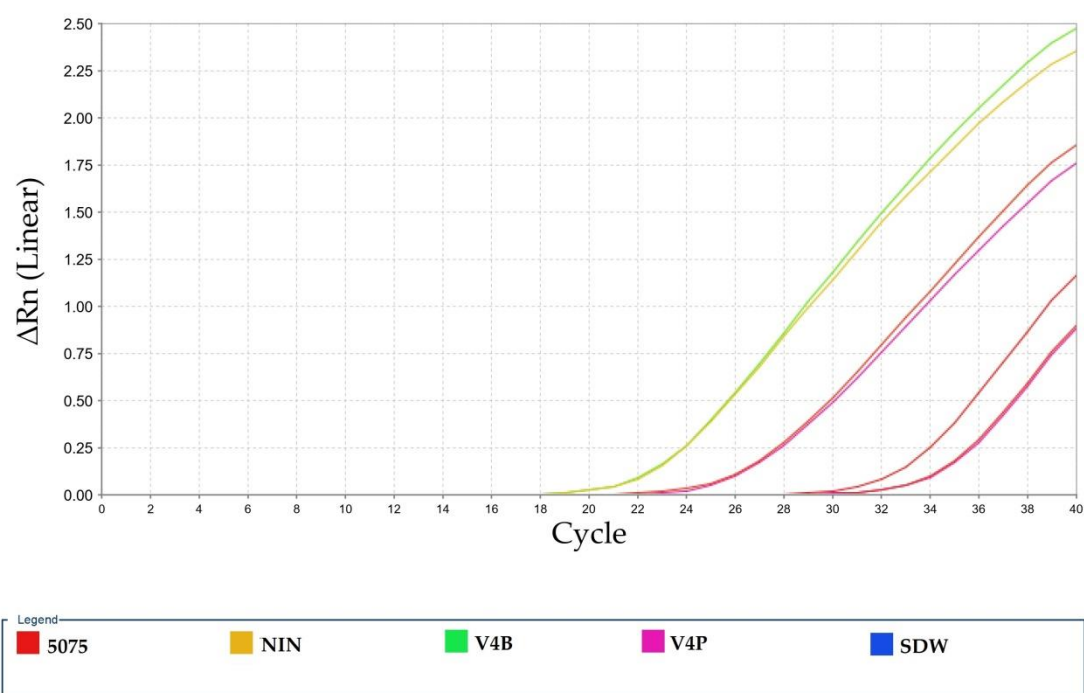

**Figure S1.** Amplification plots of positive Real-time PCR isolates of *Pseudomonas savastanoi* pv. *savastanoi* isolated from olive knots collected in Croatia and Portugal. X axis represents number of PCR amplification cycles, and y axis the fluorescence emission intensity of the reporter dye (VIC) divided by the fluorescence emission intensity of the passive reference dye (ROX). Endogenous control was *iaaL*, while sterile distilled water served as negative control (SDW). Positive isolates are represented with curves coloured for each isolate listed in figure legends. Codes of isolates are compliant with those listed in Table 2 in manuscript.
