# Supplementary material for: Identification and Characterisation of Pseudomonas savastanoi pv. savastanoi as the Causal Agent of Olive Knot Disease in Croatian, Slovenian and Portuguese Olive (Olea europaea L.) Orchards
Source: Plants (Basel). 2023 Jan 9;12(2):307. doi: 10.3390/plants12020307 (PMC9865541; doi:10.3390/plants12020307)
Supplement: Supplementary file 1 [file plants-12-00307-s001.zip › Figure S3. Bichemical and physiological characteristics of Pss isolates.pdf]

| Characteristic                                                                      | Percentage of <i>P. savastanoi</i> pv. <i>savastanoi</i> isolates (%) |                                  |                                 |     |
|-------------------------------------------------------------------------------------|-----------------------------------------------------------------------|----------------------------------|---------------------------------|-----|
|                                                                                     | Croatian isolates                                                     | Slovenian isolates               | Portuguese isolates             |     |
| Levan production*                                                                   |                                                                       |                                  |                                 |     |
| 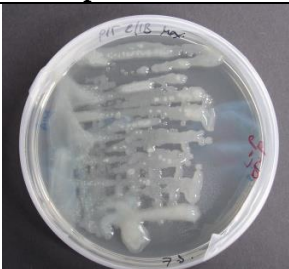   | P                                                                     | 0                                | 0                               |     |
| 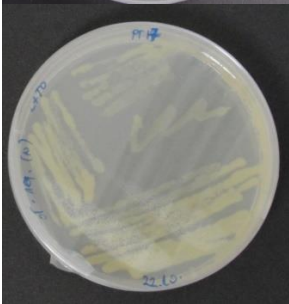   | N                                                                     | 100                              | 100                             |     |
| Oxidase test**                                                                      |                                                                       |                                  |                                 |     |
| 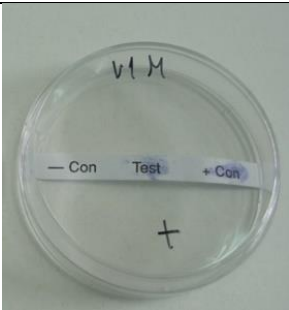 | P                                                                     | 6.25 (P44F, B45C-PR)             | 10.00 (L1-1, F4-1, F4-4)        | 0   |
|                                                                                     | DP                                                                    | 12.50 (17L, VS28L, VS28N, VS29L) | 76.67                           | 0   |
|                                                                                     | N                                                                     | 80.45                            | 13.33 (L6-2, L5-1, F4-2, At2-4) | 100 |
| Pectolytic activity***                                                              |                                                                       |                                  |                                 |     |

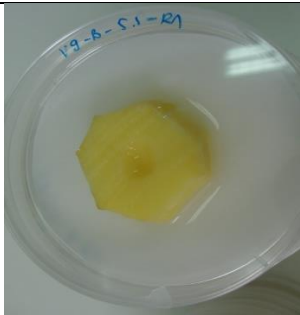

|   |     |     |     |
|---|-----|-----|-----|
| P | 0   | 0   | 0   |
| N | 100 | 100 | 100 |

**Arginine dihydrolase activity\*\*\*\***

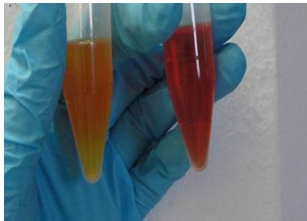

|   |     |     |     |
|---|-----|-----|-----|
| P | 0   | 0   | 0   |
| N | 100 | 100 | 100 |

**Tobacco hypersensitivity reaction\*\*\*\*\***

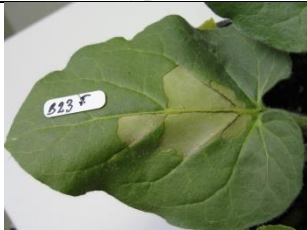

|   |                 |     |     |
|---|-----------------|-----|-----|
| P | 93.75           | 100 | 100 |
| N | 6.25 (V4B, V4P) | 0   | 0   |

**Gram reaction\*\*\*\*\***

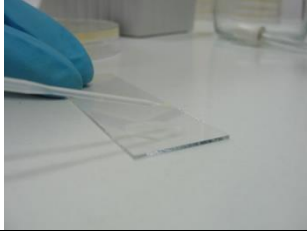

|   |     |     |     |
|---|-----|-----|-----|
| P | 100 | 100 | 100 |
| N | 0   | 0   | 0   |

Fluorescence on KB  
medium under UV  
light\*\*\*\*\*

|                                                                                   |   |                                                                      |     |     |
|-----------------------------------------------------------------------------------|---|----------------------------------------------------------------------|-----|-----|
| 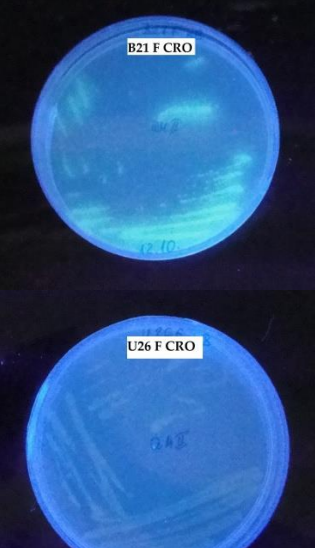 | P | 28.10 (V4P, R12L, P15TR,<br>P15N, B19F, B19P, B21F, 16L,<br>B45C-PR) | 100 | 100 |
|                                                                                   | N | 71.90                                                                | 0   | 0   |

**Figure S3.** Biochemical and physiological characterization of molecularly identified *Pss* isolates from Croatian, Slovenian and Portuguese olive orchards based on determinative scheme for *Pseudomonas* species.

P – Positive; N – Negative; DP – Delayed positive

\*Levan production – first picture represents unknown bacterium isolated from sample material P15R/IB which resulted positive for this characteristic, while picture below represents confirmed *Pss* isolate PT17 (Portugal) that resulted as negative in production of levan when grown on 5% sucrose nutrient agarised medium.

\*\*Oxidase activity – picture represents oxidase positive bacterial sample using commercial oxidase strips.

\*\*\*Pectolytic activity – picture represents absence of potato soft root when inoculated with bacterium *Pss* (isolate V9 B - Croatia).

\*\*\*\*Arginine dihydrolase activity – left tube on the picture represents negative results for this trait and right tube positive results after incubation period of four days in Thornley's medium 2A.

\*\*\*\*\*Tobacco hypersensitivity reaction – pictures represent the collapse of tobacco leaf tissue after 24 h when *Pss* isolate B24 F is inoculated.

\*\*\*\*\*Gram reaction – picture represents determination of Gram reaction using 3% potassium hydroxide on 24 h old bacterial cultures.

\*\*\*\*\*Fluorescence under UV light – Upper picture represents *Pss* isolate B21 F positive for production of fluorescent pigment under UV light (366 nm wavelength), while bottom picture represents *Pss* isolate U26 F with absence of fluorescent pigment production *in vitro*.
