# Supplementary material for: Identification and Characterisation of Pseudomonas savastanoi pv. savastanoi as the Causal Agent of Olive Knot Disease in Croatian, Slovenian and Portuguese Olive (Olea europaea L.) Orchards
Source: Plants (Basel). 2023 Jan 9;12(2):307. doi: 10.3390/plants12020307 (PMC9865541; doi:10.3390/plants12020307)
Supplement: Supplementary file 1 [file plants-12-00307-s001.zip › Figure S4. Colony morphology of tested Pss isolates.pdf]

| Isolate                              |               | Morphological trait |                       |               |                  |                                                                                       |
|--------------------------------------|---------------|---------------------|-----------------------|---------------|------------------|---------------------------------------------------------------------------------------|
| Code                                 | Diameter (mm) | Shape               | Margins               | Colony center | Pigment          | Colony figure                                                                         |
| <b>CFBP5075<br/>Reference strain</b> | 1-2           | Round and oval      | Smooth                | Dark          | White-grey       | 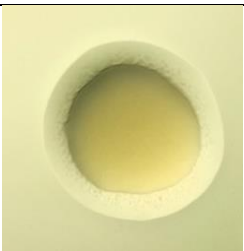   |
| <b>PT3<br/>Negative isolate</b>      | 1-3           | Round               | Smooth                | Light         | Intensive yellow | 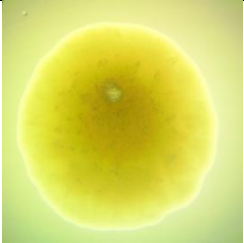   |
| <b>V4B</b>                           | 2             | Round               | Smooth                | Dark          | Yellow           | 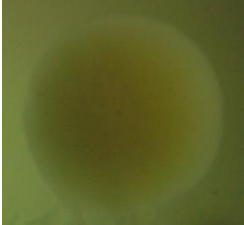  |
| <b>V4P</b>                           | 2-3           | Round and oval      | Smooth and corrugated | Dark          | White-gray       | 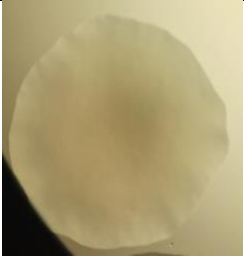 |
| <b>V7K</b>                           | 2-3           | Round and oval      | Smooth                | Dark          | Yellow           | 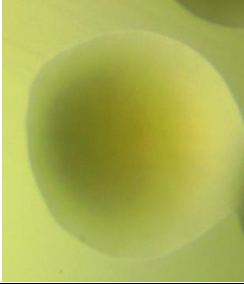 |
| <b>V9B</b>                           | 2-3           | Round               | Smooth                | Dark          | Yellow           | 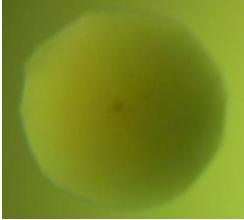 |

|              |      |                |        |       |            |                                                                                       |
|--------------|------|----------------|--------|-------|------------|---------------------------------------------------------------------------------------|
| <b>R12L</b>  | 2-3  | Round and oval | Smooth | Dark  | White-grey | 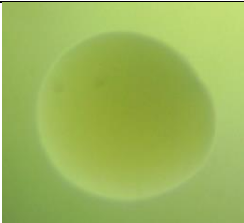   |
| <b>P15TR</b> | 1-3  | Round          | Smooth | Dark  | White-grey | 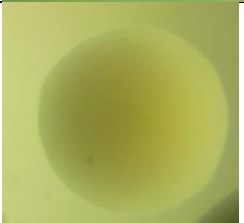   |
| <b>P15N</b>  | 2-3  | Round          | Smooth | Dark  | White-grey | 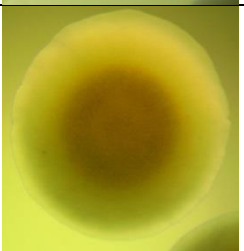   |
| <b>B17L</b>  | 1-2  | Round and oval | Smooth | Dark  | Yellow     | 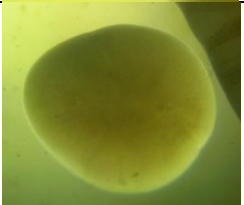  |
| <b>B19F</b>  | 3    | Round          | Smooth | Dark  | White-grey | -                                                                                     |
| <b>B19L</b>  | 2    | Round          | Smooth | Dark  | Yellow     | -                                                                                     |
| <b>B19P</b>  | 2-3  | Round and oval | Smooth | Light | White-grey | 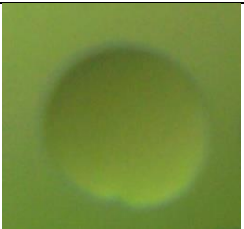 |
| <b>B21L</b>  | 1-2  | Round          | Smooth | Light | Yellow     | 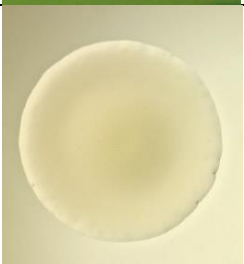 |
| <b>B21F</b>  | 1.-3 | Round and oval | Smooth | Dark  | White-grey | 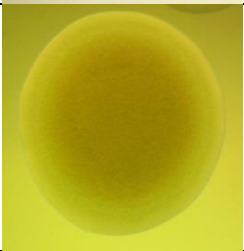 |

|              |     |                |                       |      |            |                                                                                       |
|--------------|-----|----------------|-----------------------|------|------------|---------------------------------------------------------------------------------------|
| <b>B23F</b>  | 1-2 | Round          | Smooth                | Dark | White-grey | 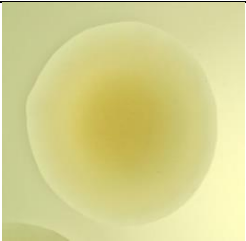   |
| <b>16L</b>   | 2-3 | Round          | Smooth and corrugated | Dark | White-grey | -                                                                                     |
| <b>17L</b>   | 1-2 | Round          | Smooth                | Dark | White-grey | -                                                                                     |
| <b>NIN</b>   | 2   | Round          | Smooth                | Dark | White-grey | -                                                                                     |
| <b>U26F</b>  | 2   | Round          | Smooth and corrugated | Dark | Yellow     | 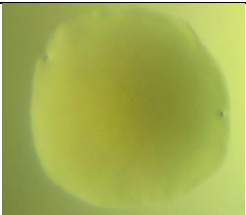   |
| <b>U27F</b>  | 2-3 | Round and oval | Smooth                | Dark | Yellow     | 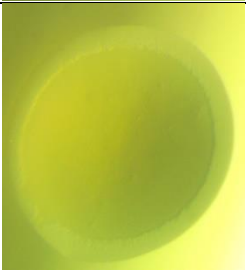  |
| <b>VS28N</b> | 2-3 | Round and oval | Smooth and corrugated | Dark | Yellow     | 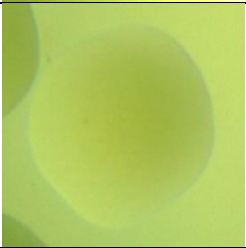 |
| <b>VS28L</b> | 1-2 | Round          | Smooth and corrugated | Dark | Yellow     | 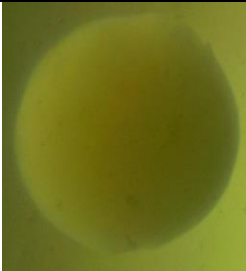 |
| <b>VS29L</b> | 1-2 | Round          | Smooth                | Dark | White-grey | 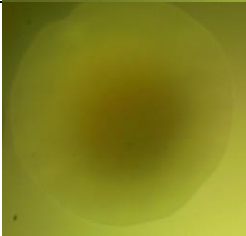 |

|                |     |                |                       |       |            |                                                                                       |
|----------------|-----|----------------|-----------------------|-------|------------|---------------------------------------------------------------------------------------|
| <b>VS31L</b>   | 1-2 | Round and oval | Smooth and corrugated | Dark  | White-grey | 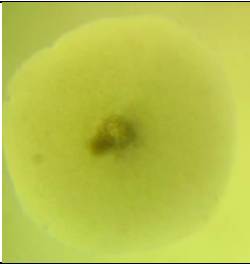   |
| <b>R34F</b>    | 2-3 | Round and oval | Smooth                | Light | White-grey | -                                                                                     |
| <b>BR37L</b>   | 2   | Round          | Smooth and corrugated | Light | Yellow     | -                                                                                     |
| <b>N40M</b>    | 2-3 | Round and oval | Smooth                | Light | Yellow     | 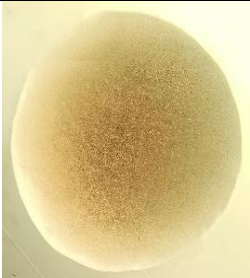   |
| <b>N41F</b>    | 2-3 | Round and oval | Smooth                | Dark  | Yellow     | 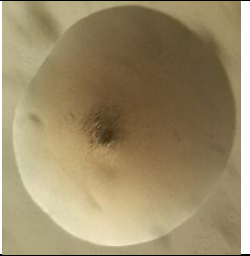  |
| <b>N42F</b>    | 2-3 | Round and ova  | Smooth                | Light | Yellow     | 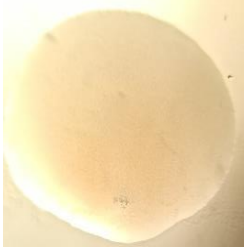 |
| <b>N43L</b>    | 2   | Round          | Smooth                | Dark  | White-grey | 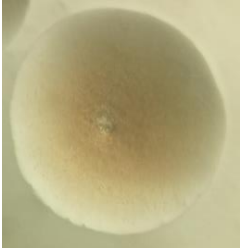 |
| <b>N43P</b>    | 2-3 | Round and oval | Smooth                | Dark  | White-grey | 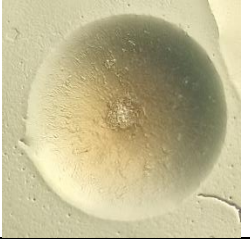 |
| <b>P44F</b>    | 2-3 | Round          | Smooth                | Dark  | White-grey | -                                                                                     |
| <b>B45C-PR</b> | 2-3 | Round          | Smooth                | Dark  | White-grey | -                                                                                     |

|                           |       |       |        |       |            |                                                                                     |
|---------------------------|-------|-------|--------|-------|------------|-------------------------------------------------------------------------------------|
| <b>PT15</b>               | 1-2   | Round | Smooth | Light | Yellow     | 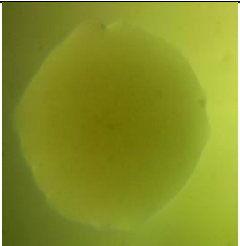 |
| <b>PT17</b>               | 1-2   | Round | Smooth | Dark  | Yellow     | 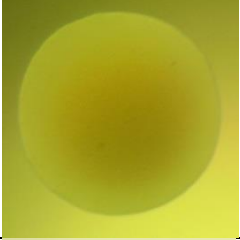 |
| <b>Slovenian isolates</b> | 0.5-1 | Round | Smooth | Light | White-grey | 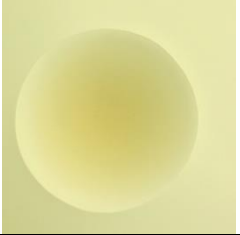 |

**Figure S4.** Colony morphology of bacterial colonies of molecularly identified *Pss* compared to *Pss* reference strain CFBP5075 (Italy) and unknown bacterial isolate PT3 after 48 h of growth on agarised King's B growth medium.
