# Supplementary material for: Identification and Characterisation of Pseudomonas savastanoi pv. savastanoi as the Causal Agent of Olive Knot Disease in Croatian, Slovenian and Portuguese Olive (Olea europaea L.) Orchards
Source: Plants (Basel). 2023 Jan 9;12(2):307. doi: 10.3390/plants12020307 (PMC9865541; doi:10.3390/plants12020307)
Supplement: Supplementary file 1 [file plants-12-00307-s001.zip › Supplementary S1. Slovenian PCR positive Pss isolates confirmed using mass spectrometry.pdf]

# Bruker Daltonik MALDI Biotyper Classification Results

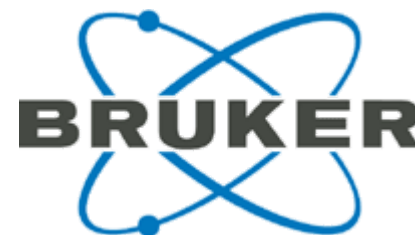

## Project Info:

Project Name: 20211119d KIS 11-21-60x  
 Project Description:  
 Project Owner: admin@FLEX-PC  
 Project Creation Date/Time: 2021-11-19T14:07:42.862  
 Project Analyte Count: 60  
 Project Type: Development  
 Validation: not present  
 Validation Position:

## Result Overview

| Analyte Name                   | Analyte ID | Organism (best match)  | Score Value           | Organism (second best match) | Score Value           |
|--------------------------------|------------|------------------------|-----------------------|------------------------------|-----------------------|
| <a href="#">A1</a><br>(+++)(C) | 1          | Pseudomonas savastanoi | <a href="#">2.309</a> | Pseudomonas savastanoi       | <a href="#">2.039</a> |
| <a href="#">A2</a><br>(++)(C)  | 2          | Pseudomonas savastanoi | <a href="#">2.289</a> | Pseudomonas savastanoi       | <a href="#">2.087</a> |
| <a href="#">A3</a><br>(++)(C)  | 3          | Pseudomonas savastanoi | <a href="#">2.257</a> | Pseudomonas savastanoi       | <a href="#">2.034</a> |
| <a href="#">A4</a><br>(+++)(C) | 4          | Pseudomonas savastanoi | <a href="#">2.337</a> | Pseudomonas savastanoi       | <a href="#">2.075</a> |
| <a href="#">A5</a><br>(+++)(C) | 5          | Pseudomonas savastanoi | <a href="#">2.334</a> | Pseudomonas savastanoi       | <a href="#">2.103</a> |
| <a href="#">A6</a><br>(+++)(C) | 6          | Pseudomonas savastanoi | <a href="#">2.378</a> | Pseudomonas savastanoi       | <a href="#">2.214</a> |
| <a href="#">A7</a><br>(+++)(C) | 7          | Pseudomonas savastanoi | <a href="#">2.316</a> | Pseudomonas savastanoi       | <a href="#">2.126</a> |
| <a href="#">A8</a><br>(+++)(C) | 8          | Pseudomonas savastanoi | <a href="#">2.325</a> | Pseudomonas savastanoi       | <a href="#">2.184</a> |
| <a href="#">A9</a><br>(++)(C)  | 9          | Pseudomonas savastanoi | <a href="#">2.263</a> | Pseudomonas savastanoi       | <a href="#">2.175</a> |

|                                 |    |                        |                       |                        |                       |
|---------------------------------|----|------------------------|-----------------------|------------------------|-----------------------|
| <a href="#">A10</a><br>(++) (C) | 10 | Pseudomonas savastanoi | <a href="#">2.293</a> | Pseudomonas savastanoi | <a href="#">2.1</a>   |
| <a href="#">A11</a><br>(++) (C) | 11 | Pseudomonas savastanoi | <a href="#">2.288</a> | Pseudomonas savastanoi | <a href="#">2.005</a> |
| <a href="#">A12</a><br>(+++)(C) | 12 | Pseudomonas savastanoi | <a href="#">2.37</a>  | Pseudomonas savastanoi | <a href="#">2.096</a> |
| <a href="#">B1</a><br>(+++)(C)  | 13 | Pseudomonas savastanoi | <a href="#">2.315</a> | Pseudomonas savastanoi | <a href="#">2.122</a> |
| <a href="#">B2</a><br>(++) (C)  | 14 | Pseudomonas savastanoi | <a href="#">2.206</a> | Pseudomonas savastanoi | <a href="#">2.053</a> |
| <a href="#">B3</a><br>(++) (C)  | 15 | Pseudomonas savastanoi | <a href="#">2.293</a> | Pseudomonas savastanoi | <a href="#">2.23</a>  |
| <a href="#">B4</a><br>(++) (C)  | 16 | Pseudomonas savastanoi | <a href="#">2.278</a> | Pseudomonas savastanoi | <a href="#">2.115</a> |
| <a href="#">B5</a><br>(+++)(C)  | 17 | Pseudomonas savastanoi | <a href="#">2.335</a> | Pseudomonas savastanoi | <a href="#">2.183</a> |
| <a href="#">B6</a><br>(++) (C)  | 18 | Pseudomonas savastanoi | <a href="#">2.238</a> | Pseudomonas savastanoi | <a href="#">2.125</a> |
| <a href="#">B7</a><br>(++) (C)  | 19 | Pseudomonas savastanoi | <a href="#">2.294</a> | Pseudomonas savastanoi | <a href="#">2.214</a> |
| <a href="#">B8</a><br>(+++)(C)  | 20 | Pseudomonas savastanoi | <a href="#">2.37</a>  | Pseudomonas savastanoi | <a href="#">2.228</a> |
| <a href="#">B9</a><br>(++) (C)  | 21 | Pseudomonas savastanoi | <a href="#">2.243</a> | Pseudomonas savastanoi | <a href="#">2.173</a> |
| <a href="#">B10</a><br>(++) (C) | 22 | Pseudomonas savastanoi | <a href="#">2.267</a> | Pseudomonas savastanoi | <a href="#">2.162</a> |
| <a href="#">B11</a><br>(+++)(C) | 23 | Pseudomonas savastanoi | <a href="#">2.383</a> | Pseudomonas savastanoi | <a href="#">2.143</a> |
| <a href="#">B12</a><br>(+++)(C) | 24 | Pseudomonas savastanoi | <a href="#">2.308</a> | Pseudomonas savastanoi | <a href="#">2.194</a> |
| <a href="#">C1</a><br>(+++)(C)  | 25 | Pseudomonas savastanoi | <a href="#">2.314</a> | Pseudomonas savastanoi | <a href="#">2.246</a> |
| <a href="#">C2</a><br>(++) (C)  | 26 | Pseudomonas savastanoi | <a href="#">2.289</a> | Pseudomonas savastanoi | <a href="#">2.095</a> |
| <a href="#">C3</a><br>(+++)(C)  | 27 | Pseudomonas savastanoi | <a href="#">2.32</a>  | Pseudomonas savastanoi | <a href="#">2.188</a> |
| <a href="#">C4</a><br>(++) (C)  | 28 | Pseudomonas savastanoi | <a href="#">2.257</a> | Pseudomonas savastanoi | <a href="#">2.151</a> |
| <a href="#">C5</a><br>(++) (C)  | 29 | Pseudomonas savastanoi | <a href="#">2.291</a> | Pseudomonas savastanoi | <a href="#">2.183</a> |
| <a href="#">C6</a>              | 30 | Pseudomonas savastanoi | <a href="#">2.297</a> | Pseudomonas savastanoi | <a href="#">2.249</a> |

|                                 |    |                                    |                       |                                    |                       |
|---------------------------------|----|------------------------------------|-----------------------|------------------------------------|-----------------------|
| (++) (C)                        |    |                                    |                       |                                    |                       |
| <a href="#">C7</a><br>(++) (C)  | 31 | Pseudomonas savastanoi             | <a href="#">2.276</a> | Pseudomonas savastanoi             | <a href="#">2.235</a> |
| <a href="#">C8</a><br>(++) (C)  | 32 | Pseudomonas savastanoi             | <a href="#">2.297</a> | Pseudomonas savastanoi             | <a href="#">2.283</a> |
| <a href="#">C9</a><br>(+++)(C)  | 33 | Pseudomonas savastanoi             | <a href="#">2.334</a> | Pseudomonas savastanoi             | <a href="#">2.238</a> |
| <a href="#">C10</a><br>(++) (C) | 34 | Pseudomonas savastanoi             | <a href="#">2.178</a> | Pseudomonas savastanoi             | <a href="#">2.143</a> |
| <a href="#">C11</a><br>(++) (C) | 35 | Pseudomonas savastanoi             | <a href="#">2.291</a> | Pseudomonas savastanoi             | <a href="#">2.167</a> |
| <a href="#">C12</a><br>(++) (C) | 36 | Pseudomonas savastanoi             | <a href="#">2.26</a>  | Pseudomonas savastanoi             | <a href="#">2.169</a> |
| <a href="#">D1</a><br>(-)(C)    | 37 | <b>no peaks found</b>              | <a href="#">≤ 0</a>   | <b>no peaks found</b>              | <a href="#">≤ 0</a>   |
| <a href="#">D2</a><br>(++) (C)  | 38 | Pseudomonas savastanoi             | <a href="#">2.265</a> | Pseudomonas savastanoi             | <a href="#">2.183</a> |
| <a href="#">D3</a><br>(++) (C)  | 39 | Pseudomonas savastanoi             | <a href="#">2.256</a> | Pseudomonas savastanoi             | <a href="#">2.123</a> |
| <a href="#">D4</a><br>(++) (C)  | 40 | Pseudomonas savastanoi             | <a href="#">2.278</a> | Pseudomonas savastanoi             | <a href="#">2.219</a> |
| <a href="#">D5</a><br>(+++)(C)  | 41 | Pseudomonas savastanoi             | <a href="#">2.369</a> | Pseudomonas savastanoi             | <a href="#">2.115</a> |
| <a href="#">D6</a><br>(++) (C)  | 42 | Pseudomonas savastanoi             | <a href="#">2.283</a> | Pseudomonas savastanoi             | <a href="#">2.061</a> |
| <a href="#">D7</a><br>(+++)(C)  | 43 | Pseudomonas savastanoi             | <a href="#">2.351</a> | Pseudomonas savastanoi             | <a href="#">2.183</a> |
| <a href="#">D8</a><br>(+++)(C)  | 44 | Pseudomonas savastanoi             | <a href="#">2.347</a> | Pseudomonas savastanoi             | <a href="#">2.173</a> |
| <a href="#">D9</a><br>(++) (C)  | 45 | Pseudomonas savastanoi             | <a href="#">2.228</a> | Pseudomonas savastanoi             | <a href="#">2.113</a> |
| <a href="#">D10</a><br>(+++)(C) | 46 | Pseudomonas savastanoi             | <a href="#">2.357</a> | Pseudomonas savastanoi             | <a href="#">2.168</a> |
| <a href="#">D11</a><br>(+++)(C) | 47 | Pseudomonas savastanoi             | <a href="#">2.325</a> | Pseudomonas savastanoi             | <a href="#">2.087</a> |
| <a href="#">D12</a><br>(+++)(C) | 48 | Pseudomonas savastanoi             | <a href="#">2.321</a> | Pseudomonas savastanoi             | <a href="#">2.078</a> |
| <a href="#">E1</a><br>(++) (C)  | 49 | Pseudomonas savastanoi             | <a href="#">2.289</a> | Pseudomonas savastanoi             | <a href="#">2.092</a> |
| <a href="#">E2</a><br>(-)(C)    | 50 | <b>not reliable identification</b> | <a href="#">1.599</a> | <b>not reliable identification</b> | <a href="#">1.377</a> |

|                                 |    |                                     |                       |                                     |                       |
|---------------------------------|----|-------------------------------------|-----------------------|-------------------------------------|-----------------------|
| <a href="#">E3</a><br>(+++)(C)  | 51 | Pseudomonas savastanoi              | <a href="#">2.361</a> | Pseudomonas savastanoi              | <a href="#">2.181</a> |
| <a href="#">E4</a><br>(-)(C)    | 52 | not reliable identification         | <a href="#">1.604</a> | not reliable identification         | <a href="#">1.502</a> |
| <a href="#">E5</a><br>(-)(C)    | 53 | not reliable identification         | <a href="#">1.688</a> | not reliable identification         | <a href="#">1.304</a> |
| <a href="#">E6</a><br>(+++)(A)  | 54 | <a href="#">Bacillus megaterium</a> | <a href="#">2.391</a> | <a href="#">Bacillus megaterium</a> | <a href="#">2.341</a> |
| <a href="#">E7</a><br>(-)(C)    | 55 | not reliable identification         | <a href="#">1.642</a> | not reliable identification         | <a href="#">1.253</a> |
| <a href="#">E8</a><br>(++)(C)   | 56 | Pseudomonas savastanoi              | <a href="#">2.292</a> | Pseudomonas savastanoi              | <a href="#">2.062</a> |
| <a href="#">E9</a><br>(+++)(C)  | 57 | Pseudomonas savastanoi              | <a href="#">2.304</a> | Pseudomonas savastanoi              | <a href="#">2.127</a> |
| <a href="#">E10</a><br>(+++)(C) | 58 | Pseudomonas savastanoi              | <a href="#">2.3</a>   | Pseudomonas savastanoi              | <a href="#">2.141</a> |
| <a href="#">E11</a><br>(++)(C)  | 59 | Pseudomonas savastanoi              | <a href="#">2.244</a> | Pseudomonas caricapapayae           | <a href="#">2.02</a>  |
| <a href="#">E12</a><br>(+++)(C) | 60 | Pseudomonas savastanoi              | <a href="#">2.316</a> | Pseudomonas savastanoi              | <a href="#">2.136</a> |

## Matching Hints

| Matched Pattern                               | Comment                                                                                                                                                    |
|-----------------------------------------------|------------------------------------------------------------------------------------------------------------------------------------------------------------|
| Bacillus cohnii DSM<br>6307T DSM              | The quality of spectra (score) depends on the degree of sporulation: Use fresh material.                                                                   |
| Bacillus megaterium<br>DSM 1668 DSM           | The quality of spectra (score) depends on the degree of sporulation: Use fresh material.                                                                   |
| Bacillus megaterium<br>DSM 2894 DSM           | The quality of spectra (score) depends on the degree of sporulation: Use fresh material.                                                                   |
| Bacillus megaterium<br>DSM 32T DSM            | The quality of spectra (score) depends on the degree of sporulation: Use fresh material.                                                                   |
| Bacillus sonorensis<br>DSM 13779T DSM         | is a member of Bacillus subtilis group. The quality of spectra (score) depends on the degree of sporulation: Use fresh material.                           |
| Citrobacter freundii<br>22054_1 CHB           | Species of this genus have very similar patterns: Therefore distinguishing their species is difficult.                                                     |
| Lactobacillus<br>amylovorus DSM<br>20531T DSM | Species acidophilus / amylovorus / kitasatonis of the genus Lactobacillus have very similar patterns: Therefore distinguishing their species is difficult. |
| Proteus vulgaris (PX)<br>22086129 MLD         | Species hauseri / penneri / vulgaris of the genus Proteus have very similar patterns: Therefore distinguishing their species is difficult.                 |
| Pseudomonas congelans<br>DSM 14939T HAM       | is a member of Pseudomonas fluorescens group                                                                                                               |

## Meaning of Score Values

| Range           | Description                                                  | Symbols   | Color  |
|-----------------|--------------------------------------------------------------|-----------|--------|
| 2.300 ... 3.000 | highly probable species identification                       | ( + + + ) | green  |
| 2.000 ... 2.299 | secure genus identification, probable species identification | ( + + )   | green  |
| 1.700 ... 1.999 | probable genus identification                                | ( + )     | yellow |
| 0.000 ... 1.699 | not reliable identification                                  | ( - )     | red    |

## Meaning of Consistency Categories (A - C)

| Category | Description                                                                                                                                                                                                                             |
|----------|-----------------------------------------------------------------------------------------------------------------------------------------------------------------------------------------------------------------------------------------|
| A        | <b>Species Consistency:</b> The best match was classified as 'green' (see above). Further 'green' matches are of the same species as the first one. Further 'yellow' matches are at least of the same genus as the first one.           |
| B        | <b>Genus Consistency:</b> The best match was classified as 'green' or 'yellow' (see above). Further 'green' or 'yellow' matches have at least the same genus as the first one. The conditions of species consistency are not fulfilled. |
| C        | <b>No Consistency:</b> Neither species nor genus consistency (Please check for synonyms of names or microbial mixture).                                                                                                                 |

## Analyte1

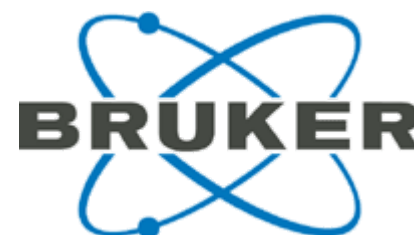

Analyte Name: A1  
 Analyte Description:  
 Analyte ID: 1  
 Analyte Creation Date/Time: 2021-11-19T14:09:10.682  
 Applied MSP Library(ies):  
 Applied Taxonomy Tree: Projects, Bruker Taxonomy

| Rank (Quality) | Matched Pattern                                     | Score Value | NCBI Identifier       |
|----------------|-----------------------------------------------------|-------------|-----------------------|
| 1<br>( + + + ) | Pseudomonas savastanoi ssp savastanoi LMG 2209T HAM | 2.309       | <a href="#">29438</a> |

|           |                                                         |       |                        |
|-----------|---------------------------------------------------------|-------|------------------------|
| 2<br>(++) | Pseudomonas savastanoi ssp savastanoi LMG 5011 HAM      | 2.039 | <a href="#">29438</a>  |
| 3<br>(+)  | Pseudomonas syringae ssp syringae DSM 6693 HAM          | 1.898 | <a href="#">317</a>    |
| 4<br>(+)  | 2501                                                    | 1.793 | <a href="#">451320</a> |
| 5<br>(+)  | Pseudomonas agarici DSM 11810T HAM                      | 1.738 | <a href="#">46677</a>  |
| 6<br>(+)  | <a href="#">Pseudomonas congelans DSM 14939T HAM</a>    | 1.71  | <a href="#">200452</a> |
| 7<br>(-)  | Pseudomonas caricapapayae LMG 2152T HAM                 | 1.613 | <a href="#">46678</a>  |
| 8<br>(-)  | Pseudomonas avellanae DSM 11809T DSM                    | 1.607 | <a href="#">46257</a>  |
| 9<br>(-)  | 2502                                                    | 1.567 | <a href="#">451320</a> |
| 10<br>(-) | Pseudomonas chlororaphis ssp aurantiaca CIP 106718T HAM | 1.519 | <a href="#">333</a>    |

**Analyte2**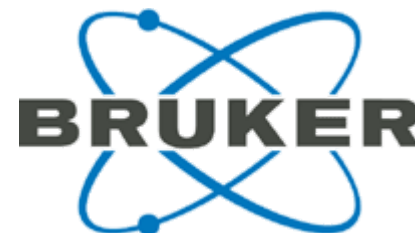

Analyte Name: A2  
 Analyte Description:  
 Analyte ID: 2  
 Analyte Creation Date/Time: 2021-11-19T14:09:09.859  
 Applied MSP Library(ies):  
 Applied Taxonomy Tree: Projects, Bruker Taxonomy

| Rank<br>(Quality) | Matched Pattern                                          | Score<br>Value | NCBI<br>Identifier     |
|-------------------|----------------------------------------------------------|----------------|------------------------|
| 1<br>(++)         | Pseudomonas savastanoi ssp savastanoi LMG 2209T HAM      | 2.289          | <a href="#">29438</a>  |
| 2<br>(++)         | Pseudomonas savastanoi ssp savastanoi LMG 5011 HAM       | 2.087          | <a href="#">29438</a>  |
| 3<br>(+)          | Pseudomonas agarici DSM 11810T HAM                       | 1.768          | <a href="#">46677</a>  |
| 4<br>(+)          | 2501                                                     | 1.753          | <a href="#">451320</a> |
| 5<br>(+)          | <a href="#">Pseudomonas congelans DSM 14939T HAM</a>     | 1.737          | <a href="#">200452</a> |
| 6<br>(+)          | Pseudomonas syringae ssp syringae DSM 6693 HAM           | 1.73           | <a href="#">317</a>    |
| 7<br>(-)          | 2502                                                     | 1.674          | <a href="#">451320</a> |
| 8<br>(-)          | Pseudomonas caricapapayae LMG 2152T HAM                  | 1.505          | <a href="#">46678</a>  |
| 9<br>(-)          | Pseudomonas cichorii DSM 50259T HAM                      | 1.499          | <a href="#">36746</a>  |
| 10<br>(-)         | Pseudomonas chlororaphis ssp chlororaphis DSM 50083T HAM | 1.48           | <a href="#">333</a>    |

**Analyte3**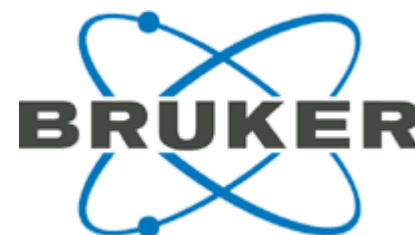

Analyte Name: A3  
 Analyte Description:  
 Analyte ID: 3  
 Analyte Creation Date/Time: 2021-11-19T14:09:10.884  
 Applied MSP Library(ies):  
 Applied Taxonomy Tree: Projects, Bruker Taxonomy

| Rank<br>(Quality) | Matched Pattern                                                       | Score<br>Value | NCBI<br>Identifier     |
|-------------------|-----------------------------------------------------------------------|----------------|------------------------|
| 1<br>(++)         | <i>Pseudomonas savastanoi</i> ssp <i>savastanoi</i> LMG 2209T HAM     | 2.257          | <a href="#">29438</a>  |
| 2<br>(++)         | <i>Pseudomonas savastanoi</i> ssp <i>savastanoi</i> LMG 5011 HAM      | 2.034          | <a href="#">29438</a>  |
| 3<br>(+)          | <i>Pseudomonas caricapapayae</i> LMG 2152T HAM                        | 1.902          | <a href="#">46678</a>  |
| 4<br>(+)          | <i>Pseudomonas avellanae</i> DSM 11809T DSM                           | 1.883          | <a href="#">46257</a>  |
| 5<br>(+)          | 2501                                                                  | 1.881          | <a href="#">451320</a> |
| 6<br>(+)          | <i>Pseudomonas syringae</i> ssp <i>syringae</i> DSM 6693 HAM          | 1.855          | <a href="#">317</a>    |
| 7<br>(+)          | <a href="#">Pseudomonas congelans DSM 14939T HAM</a>                  | 1.843          | <a href="#">200452</a> |
| 8<br>(+)          | 2502                                                                  | 1.837          | <a href="#">451320</a> |
| 9<br>(+)          | <i>Pseudomonas agarici</i> DSM 11810T HAM                             | 1.765          | <a href="#">46677</a>  |
| 10<br>(-)         | <i>Pseudomonas chlororaphis</i> ssp <i>aurantiaca</i> CIP 106718T HAM | 1.68           | <a href="#">333</a>    |

**Analyte4**

Analyte Name: A4  
 Analyte Description:  
 Analyte ID: 4  
 Analyte Creation Date/Time: 2021-11-19T14:09:10.422  
 Applied MSP Library(ies):  
 Applied Taxonomy Tree: Projects, Bruker Taxonomy

| Rank<br>(Quality) | Matched Pattern                                                   | Score<br>Value | NCBI<br>Identifier     |
|-------------------|-------------------------------------------------------------------|----------------|------------------------|
| 1<br>(+++)        | <i>Pseudomonas savastanoi</i> ssp <i>savastanoi</i> LMG 2209T HAM | 2.337          | <a href="#">29438</a>  |
| 2<br>(++)         | <i>Pseudomonas savastanoi</i> ssp <i>savastanoi</i> LMG 5011 HAM  | 2.075          | <a href="#">29438</a>  |
| 3<br>(+)          | <i>Pseudomonas syringae</i> ssp <i>syringae</i> DSM 6693 HAM      | 1.925          | <a href="#">317</a>    |
| 4<br>(+)          | <i>Pseudomonas caricapapayae</i> LMG 2152T HAM                    | 1.918          | <a href="#">46678</a>  |
| 5<br>(+)          | <i>Pseudomonas agarici</i> DSM 11810T HAM                         | 1.81           | <a href="#">46677</a>  |
| 6<br>(+)          | 2501                                                              | 1.792          | <a href="#">451320</a> |
| 7<br>(+)          | 2502                                                              | 1.785          | <a href="#">451320</a> |
| 8<br>(+)          | <a href="#">Pseudomonas congelans DSM 14939T HAM</a>              | 1.782          | <a href="#">200452</a> |
| 9<br>(+)          | <i>Pseudomonas avellanae</i> DSM 11809T DSM                       | 1.731          | <a href="#">46257</a>  |
| 10<br>(-)         | <i>Pseudomonas cichorii</i> DSM 50259T HAM                        | 1.663          | <a href="#">36746</a>  |

**Analyte5**

Analyte Name: A5  
 Analyte Description:  
 Analyte ID: 5  
 Analyte Creation Date/Time: 2021-11-19T14:09:10.247  
 Applied MSP Library(ies):  
 Applied Taxonomy Tree: Projects, Bruker Taxonomy

| Rank<br>(Quality) | Matched Pattern                                                   | Score<br>Value | NCBI<br>Identifier     |
|-------------------|-------------------------------------------------------------------|----------------|------------------------|
| 1<br>(+++)        | <i>Pseudomonas savastanoi</i> ssp <i>savastanoi</i> LMG 2209T HAM | 2.334          | <a href="#">29438</a>  |
| 2<br>(++)         | <i>Pseudomonas savastanoi</i> ssp <i>savastanoi</i> LMG 5011 HAM  | 2.103          | <a href="#">29438</a>  |
| 3<br>(+)          | <i>Pseudomonas caricapapayae</i> LMG 2152T HAM                    | 1.967          | <a href="#">46678</a>  |
| 4<br>(+)          | 2501                                                              | 1.891          | <a href="#">451320</a> |
| 5<br>(+)          | <i>Pseudomonas syringae</i> ssp <i>syringae</i> DSM 6693 HAM      | 1.859          | <a href="#">317</a>    |
| 6<br>(+)          | 2502                                                              | 1.851          | <a href="#">451320</a> |
| 7<br>(+)          | <a href="#">Pseudomonas congelans DSM 14939T HAM</a>              | 1.832          | <a href="#">200452</a> |
| 8<br>(+)          | <i>Pseudomonas agarici</i> DSM 11810T HAM                         | 1.771          | <a href="#">46677</a>  |
| 9<br>(+)          | <i>Pseudomonas avellanae</i> DSM 11809T DSM                       | 1.764          | <a href="#">46257</a>  |
| 10<br>(-)         | <i>Pseudomonas cichorii</i> DSM 50259T HAM                        | 1.68           | <a href="#">36746</a>  |

**Analyte6**

Analyte Name: A6  
 Analyte Description:  
 Analyte ID: 6  
 Analyte Creation Date/Time: 2021-11-19T14:09:09.745  
 Applied MSP Library(ies):  
 Applied Taxonomy Tree: Projects, Bruker Taxonomy

| Rank<br>(Quality) | Matched Pattern                                                        | Score<br>Value | NCBI<br>Identifier     |
|-------------------|------------------------------------------------------------------------|----------------|------------------------|
| 1<br>(+++)        | <i>Pseudomonas savastanoi</i> ssp <i>savastanoi</i> LMG 2209T HAM      | 2.378          | <a href="#">29438</a>  |
| 2<br>(++)         | <i>Pseudomonas savastanoi</i> ssp <i>savastanoi</i> LMG 5011 HAM       | 2.214          | <a href="#">29438</a>  |
| 3<br>(++)         | <i>Pseudomonas caricapapayae</i> LMG 2152T HAM                         | 2.012          | <a href="#">46678</a>  |
| 4<br>(+)          | <i>Pseudomonas syringae</i> ssp <i>syringae</i> DSM 6693 HAM           | 1.879          | <a href="#">317</a>    |
| 5<br>(+)          | 2501                                                                   | 1.862          | <a href="#">451320</a> |
| 6<br>(+)          | <a href="#">Pseudomonas congelans DSM 14939T HAM</a>                   | 1.841          | <a href="#">200452</a> |
| 7<br>(+)          | <i>Pseudomonas chlororaphis</i> ssp <i>aurantiaca</i> CIP 106718T HAM  | 1.769          | <a href="#">333</a>    |
| 8<br>(+)          | <i>Pseudomonas avellanae</i> DSM 11809T DSM                            | 1.748          | <a href="#">46257</a>  |
| 9<br>(+)          | <i>Pseudomonas cichorii</i> DSM 50259T HAM                             | 1.708          | <a href="#">36746</a>  |
| 10<br>(-)         | <i>Pseudomonas chlororaphis</i> ssp <i>chlororaphis</i> DSM 50083T HAM | 1.692          | <a href="#">333</a>    |

**Analyte7**

Analyte Name: A7  
 Analyte Description:  
 Analyte ID: 7  
 Analyte Creation Date/Time: 2021-11-19T14:09:09.694  
 Applied MSP Library(ies):  
 Applied Taxonomy Tree: Bruker Taxonomy, Projects

| Rank<br>(Quality) | Matched Pattern                                                       | Score<br>Value | NCBI<br>Identifier     |
|-------------------|-----------------------------------------------------------------------|----------------|------------------------|
| 1<br>(+++)        | <i>Pseudomonas savastanoi</i> ssp <i>savastanoi</i> LMG 2209T HAM     | 2.316          | <a href="#">29438</a>  |
| 2<br>(++)         | <i>Pseudomonas savastanoi</i> ssp <i>savastanoi</i> LMG 5011 HAM      | 2.126          | <a href="#">29438</a>  |
| 3<br>(+)          | <i>Pseudomonas caricapapayae</i> LMG 2152T HAM                        | 1.911          | <a href="#">46678</a>  |
| 4<br>(+)          | <i>Pseudomonas syringae</i> ssp <i>syringae</i> DSM 6693 HAM          | 1.873          | <a href="#">317</a>    |
| 5<br>(+)          | 2501                                                                  | 1.86           | <a href="#">451320</a> |
| 6<br>(+)          | <i>Pseudomonas agarici</i> DSM 11810T HAM                             | 1.845          | <a href="#">46677</a>  |
| 7<br>(+)          | <a href="#">Pseudomonas congelans DSM 14939T HAM</a>                  | 1.835          | <a href="#">200452</a> |
| 8<br>(+)          | 2502                                                                  | 1.763          | <a href="#">451320</a> |
| 9<br>(-)          | <i>Pseudomonas cichorii</i> DSM 50259T HAM                            | 1.693          | <a href="#">36746</a>  |
| 10<br>(-)         | <i>Pseudomonas chlororaphis</i> ssp <i>aurantiaca</i> CIP 106718T HAM | 1.644          | <a href="#">333</a>    |

**Analyte8**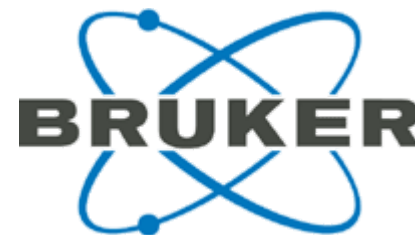

Analyte Name: A8  
 Analyte Description:  
 Analyte ID: 8  
 Analyte Creation Date/Time: 2021-11-19T14:09:10.667  
 Applied MSP Library(ies):  
 Applied Taxonomy Tree: Projects, Bruker Taxonomy

| Rank<br>(Quality) | Matched Pattern                                                   | Score<br>Value | NCBI<br>Identifier     |
|-------------------|-------------------------------------------------------------------|----------------|------------------------|
| 1<br>(+++)        | <i>Pseudomonas savastanoi</i> ssp <i>savastanoi</i> LMG 2209T HAM | 2.325          | <a href="#">29438</a>  |
| 2<br>(++)         | <i>Pseudomonas savastanoi</i> ssp <i>savastanoi</i> LMG 5011 HAM  | 2.184          | <a href="#">29438</a>  |
| 3<br>(+)          | <i>Pseudomonas caricapapayae</i> LMG 2152T HAM                    | 1.96           | <a href="#">46678</a>  |
| 4<br>(+)          | <a href="#">Pseudomonas congelans DSM 14939T HAM</a>              | 1.895          | <a href="#">200452</a> |
| 5<br>(+)          | <i>Pseudomonas syringae</i> ssp <i>syringae</i> DSM 6693 HAM      | 1.893          | <a href="#">317</a>    |
| 6<br>(+)          | 2501                                                              | 1.851          | <a href="#">451320</a> |
| 7<br>(+)          | 2502                                                              | 1.778          | <a href="#">451320</a> |
| 8<br>(+)          | <i>Pseudomonas cichorii</i> DSM 50259T HAM                        | 1.725          | <a href="#">36746</a>  |
| 9<br>(-)          | <i>Pseudomonas avellanae</i> DSM 11809T DSM                       | 1.692          | <a href="#">46257</a>  |
| 10<br>(-)         | <i>Pseudomonas viridiflava</i> DSM 11124T HAM                     | 1.661          | <a href="#">33069</a>  |

**Analyte9**

Analyte Name: A9  
 Analyte Description:  
 Analyte ID: 9  
 Analyte Creation Date/Time: 2021-11-19T14:09:09.828  
 Applied MSP Library(ies):  
 Applied Taxonomy Tree: Projects, Bruker Taxonomy

| Rank<br>(Quality) | Matched Pattern                                                       | Score<br>Value | NCBI<br>Identifier     |
|-------------------|-----------------------------------------------------------------------|----------------|------------------------|
| 1<br>(++)         | <i>Pseudomonas savastanoi</i> ssp <i>savastanoi</i> LMG 2209T HAM     | 2.263          | <a href="#">29438</a>  |
| 2<br>(++)         | <i>Pseudomonas savastanoi</i> ssp <i>savastanoi</i> LMG 5011 HAM      | 2.175          | <a href="#">29438</a>  |
| 3<br>(+)          | <i>Pseudomonas caricapapayae</i> LMG 2152T HAM                        | 1.932          | <a href="#">46678</a>  |
| 4<br>(+)          | 2501                                                                  | 1.861          | <a href="#">451320</a> |
| 5<br>(+)          | <i>Pseudomonas agarici</i> DSM 11810T HAM                             | 1.728          | <a href="#">46677</a>  |
| 6<br>(-)          | <i>Pseudomonas chlororaphis</i> ssp <i>aurantiaca</i> CIP 106718T HAM | 1.678          | <a href="#">333</a>    |
| 7<br>(-)          | <i>Pseudomonas avellanae</i> DSM 11809T DSM                           | 1.67           | <a href="#">46257</a>  |
| 8<br>(-)          | <a href="#">Pseudomonas congelans DSM 14939T HAM</a>                  | 1.661          | <a href="#">200452</a> |
| 9<br>(-)          | <i>Pseudomonas syringae</i> ssp <i>syringae</i> DSM 6693 HAM          | 1.638          | <a href="#">317</a>    |
| 10<br>(-)         | 2502                                                                  | 1.634          | <a href="#">451320</a> |

**Analyte10**

Analyte Name: A10  
 Analyte Description:  
 Analyte ID: 10  
 Analyte Creation Date/Time: 2021-11-19T14:09:10.917  
 Applied MSP Library(ies):  
 Applied Taxonomy Tree: Projects, Bruker Taxonomy

| Rank<br>(Quality) | Matched Pattern                                                   | Score<br>Value | NCBI<br>Identifier     |
|-------------------|-------------------------------------------------------------------|----------------|------------------------|
| 1<br>(++)         | <i>Pseudomonas savastanoi</i> ssp <i>savastanoi</i> LMG 2209T HAM | 2.293          | <a href="#">29438</a>  |
| 2<br>(++)         | <i>Pseudomonas savastanoi</i> ssp <i>savastanoi</i> LMG 5011 HAM  | 2.1            | <a href="#">29438</a>  |
| 3<br>(+)          | <i>Pseudomonas caricapapayae</i> LMG 2152T HAM                    | 1.867          | <a href="#">46678</a>  |
| 4<br>(+)          | 2501                                                              | 1.85           | <a href="#">451320</a> |
| 5<br>(+)          | <a href="#">Pseudomonas congelans DSM 14939T HAM</a>              | 1.84           | <a href="#">200452</a> |
| 6<br>(+)          | <i>Pseudomonas agarici</i> DSM 11810T HAM                         | 1.801          | <a href="#">46677</a>  |
| 7<br>(+)          | <i>Pseudomonas syringae</i> ssp <i>syringae</i> DSM 6693 HAM      | 1.791          | <a href="#">317</a>    |
| 8<br>(+)          | 2502                                                              | 1.769          | <a href="#">451320</a> |
| 9<br>(-)          | <i>Pseudomonas avellanae</i> DSM 11809T DSM                       | 1.692          | <a href="#">46257</a>  |
| 10<br>(-)         | <i>Pseudomonas cichorii</i> DSM 50259T HAM                        | 1.536          | <a href="#">36746</a>  |

**Analyte11**

Analyte Name: A11  
 Analyte Description:  
 Analyte ID: 11  
 Analyte Creation Date/Time: 2021-11-19T14:09:10.364  
 Applied MSP Library(ies):  
 Applied Taxonomy Tree: Bruker Taxonomy, Projects

| Rank<br>(Quality) | Matched Pattern                                                       | Score<br>Value | NCBI<br>Identifier     |
|-------------------|-----------------------------------------------------------------------|----------------|------------------------|
| 1<br>(++)         | <i>Pseudomonas savastanoi</i> ssp <i>savastanoi</i> LMG 2209T HAM     | 2.288          | <a href="#">29438</a>  |
| 2<br>(++)         | <i>Pseudomonas savastanoi</i> ssp <i>savastanoi</i> LMG 5011 HAM      | 2.005          | <a href="#">29438</a>  |
| 3<br>(+)          | <i>Pseudomonas syringae</i> ssp <i>syringae</i> DSM 6693 HAM          | 1.894          | <a href="#">317</a>    |
| 4<br>(+)          | <i>Pseudomonas avellanae</i> DSM 11809T DSM                           | 1.812          | <a href="#">46257</a>  |
| 5<br>(+)          | <i>Pseudomonas agarici</i> DSM 11810T HAM                             | 1.766          | <a href="#">46677</a>  |
| 6<br>(+)          | 2501                                                                  | 1.705          | <a href="#">451320</a> |
| 7<br>(-)          | <a href="#">Pseudomonas congelans DSM 14939T HAM</a>                  | 1.685          | <a href="#">200452</a> |
| 8<br>(-)          | <i>Pseudomonas chlororaphis</i> ssp <i>aurantiaca</i> CIP 106718T HAM | 1.64           | <a href="#">333</a>    |
| 9<br>(-)          | <i>Pseudomonas cichorii</i> DSM 50259T HAM                            | 1.584          | <a href="#">36746</a>  |
| 10<br>(-)         | 2502                                                                  | 1.549          | <a href="#">451320</a> |

**Analyte12**

Analyte Name: A12  
 Analyte Description:  
 Analyte ID: 12  
 Analyte Creation Date/Time: 2021-11-19T14:09:10.532  
 Applied MSP Library(ies):  
 Applied Taxonomy Tree: Projects, Bruker Taxonomy

| Rank<br>(Quality) | Matched Pattern                                      | Score<br>Value | NCBI<br>Identifier     |
|-------------------|------------------------------------------------------|----------------|------------------------|
| 1<br>(+++)        | Pseudomonas savastanoi ssp savastanoi LMG 2209T HAM  | 2.37           | <a href="#">29438</a>  |
| 2<br>(++)         | Pseudomonas savastanoi ssp savastanoi LMG 5011 HAM   | 2.096          | <a href="#">29438</a>  |
| 3<br>(+)          | Pseudomonas syringae ssp syringae DSM 6693 HAM       | 1.959          | <a href="#">317</a>    |
| 4<br>(+)          | Pseudomonas agarici DSM 11810T HAM                   | 1.839          | <a href="#">46677</a>  |
| 5<br>(+)          | 2501                                                 | 1.812          | <a href="#">451320</a> |
| 6<br>(+)          | <a href="#">Pseudomonas congelans DSM 14939T HAM</a> | 1.806          | <a href="#">200452</a> |
| 7<br>(+)          | Pseudomonas syringae ssp syringae LMG 1247T HAM      | 1.782          | <a href="#">317</a>    |
| 8<br>(+)          | Pseudomonas avellanae DSM 11809T DSM                 | 1.716          | <a href="#">46257</a>  |
| 9<br>(-)          | 2502                                                 | 1.698          | <a href="#">451320</a> |
| 10<br>(-)         | Pseudomonas caricapapayae LMG 2152T HAM              | 1.618          | <a href="#">46678</a>  |

**Analyte13**

Analyte Name: B1  
 Analyte Description:  
 Analyte ID: 13  
 Analyte Creation Date/Time: 2021-11-19T14:09:09.761  
 Applied MSP Library(ies):  
 Applied Taxonomy Tree: Projects, Bruker Taxonomy

| Rank<br>(Quality) | Matched Pattern                                                   | Score<br>Value | NCBI<br>Identifier     |
|-------------------|-------------------------------------------------------------------|----------------|------------------------|
| 1<br>(+++)        | <i>Pseudomonas savastanoi</i> ssp <i>savastanoi</i> LMG 2209T HAM | 2.315          | <a href="#">29438</a>  |
| 2<br>(++)         | <i>Pseudomonas savastanoi</i> ssp <i>savastanoi</i> LMG 5011 HAM  | 2.122          | <a href="#">29438</a>  |
| 3<br>(+)          | <i>Pseudomonas syringae</i> ssp <i>syringae</i> DSM 6693 HAM      | 1.91           | <a href="#">317</a>    |
| 4<br>(+)          | <i>Pseudomonas caricapapayae</i> LMG 2152T HAM                    | 1.882          | <a href="#">46678</a>  |
| 5<br>(+)          | 2501                                                              | 1.876          | <a href="#">451320</a> |
| 6<br>(+)          | 2502                                                              | 1.748          | <a href="#">451320</a> |
| 7<br>(+)          | <i>Pseudomonas agarici</i> DSM 11810T HAM                         | 1.743          | <a href="#">46677</a>  |
| 8<br>(+)          | <a href="#">Pseudomonas congelans DSM 14939T HAM</a>              | 1.738          | <a href="#">200452</a> |
| 9<br>(+)          | <i>Pseudomonas avellanae</i> DSM 11809T DSM                       | 1.734          | <a href="#">46257</a>  |
| 10<br>(-)         | <i>Pseudomonas syringae</i> ssp <i>syringae</i> LMG 1247T HAM     | 1.66           | <a href="#">317</a>    |

**Analyte14**

Analyte Name: B2  
 Analyte Description:  
 Analyte ID: 14  
 Analyte Creation Date/Time: 2021-11-19T14:09:09.945  
 Applied MSP Library(ies):  
 Applied Taxonomy Tree: Projects, Bruker Taxonomy

| Rank<br>(Quality) | Matched Pattern                                                        | Score<br>Value | NCBI<br>Identifier     |
|-------------------|------------------------------------------------------------------------|----------------|------------------------|
| 1<br>(++)         | <i>Pseudomonas savastanoi</i> ssp <i>savastanoi</i> LMG 2209T HAM      | 2.206          | <a href="#">29438</a>  |
| 2<br>(++)         | <i>Pseudomonas savastanoi</i> ssp <i>savastanoi</i> LMG 5011 HAM       | 2.053          | <a href="#">29438</a>  |
| 3<br>(+)          | 2501                                                                   | 1.919          | <a href="#">451320</a> |
| 4<br>(+)          | <i>Pseudomonas caricapapayae</i> LMG 2152T HAM                         | 1.89           | <a href="#">46678</a>  |
| 5<br>(+)          | <i>Pseudomonas syringae</i> ssp <i>syringae</i> DSM 6693 HAM           | 1.773          | <a href="#">317</a>    |
| 6<br>(+)          | <i>Pseudomonas agarici</i> DSM 11810T HAM                              | 1.717          | <a href="#">46677</a>  |
| 7<br>(+)          | <i>Pseudomonas avellanae</i> DSM 11809T DSM                            | 1.7            | <a href="#">46257</a>  |
| 8<br>(-)          | <i>Pseudomonas kilonensis</i> DSM 13647T HAM                           | 1.657          | <a href="#">132476</a> |
| 9<br>(-)          | <i>Pseudomonas thivervalensis</i> DSM 13194T HAM                       | 1.647          | <a href="#">86265</a>  |
| 10<br>(-)         | <i>Pseudomonas chlororaphis</i> ssp <i>chlororaphis</i> DSM 50083T HAM | 1.641          | <a href="#">333</a>    |

**Analyte15**

Analyte Name: B3  
 Analyte Description:  
 Analyte ID: 15  
 Analyte Creation Date/Time: 2021-11-19T14:09:09.619  
 Applied MSP Library(ies):  
 Applied Taxonomy Tree: Projects, Bruker Taxonomy

| Rank<br>(Quality) | Matched Pattern                                                   | Score<br>Value | NCBI<br>Identifier     |
|-------------------|-------------------------------------------------------------------|----------------|------------------------|
| 1<br>(++)         | <i>Pseudomonas savastanoi</i> ssp <i>savastanoi</i> LMG 2209T HAM | 2.293          | <a href="#">29438</a>  |
| 2<br>(++)         | <i>Pseudomonas savastanoi</i> ssp <i>savastanoi</i> LMG 5011 HAM  | 2.23           | <a href="#">29438</a>  |
| 3<br>(++)         | <i>Pseudomonas caricapapayae</i> LMG 2152T HAM                    | 2.06           | <a href="#">46678</a>  |
| 4<br>(+)          | <i>Pseudomonas syringae</i> ssp <i>syringae</i> DSM 6693 HAM      | 1.92           | <a href="#">317</a>    |
| 5<br>(+)          | 2501                                                              | 1.901          | <a href="#">451320</a> |
| 6<br>(+)          | <a href="#">Pseudomonas congelans DSM 14939T HAM</a>              | 1.866          | <a href="#">200452</a> |
| 7<br>(+)          | <i>Pseudomonas cichorii</i> DSM 50259T HAM                        | 1.777          | <a href="#">36746</a>  |
| 8<br>(+)          | 2502                                                              | 1.713          | <a href="#">451320</a> |
| 9<br>(-)          | <i>Pseudomonas agarici</i> DSM 11810T HAM                         | 1.64           | <a href="#">46677</a>  |
| 10<br>(-)         | <i>Pseudomonas avellanae</i> DSM 11809T DSM                       | 1.64           | <a href="#">46257</a>  |

**Analyte16**

Analyte Name: B4  
 Analyte Description:  
 Analyte ID: 16  
 Analyte Creation Date/Time: 2021-11-19T14:09:09.970  
 Applied MSP Library(ies):  
 Applied Taxonomy Tree: Bruker Taxonomy, Projects

| Rank<br>(Quality) | Matched Pattern                                                   | Score<br>Value | NCBI<br>Identifier     |
|-------------------|-------------------------------------------------------------------|----------------|------------------------|
| 1<br>(++)         | <i>Pseudomonas savastanoi</i> ssp <i>savastanoi</i> LMG 2209T HAM | 2.278          | <a href="#">29438</a>  |
| 2<br>(++)         | <i>Pseudomonas savastanoi</i> ssp <i>savastanoi</i> LMG 5011 HAM  | 2.115          | <a href="#">29438</a>  |
| 3<br>(+)          | 2501                                                              | 1.916          | <a href="#">451320</a> |
| 4<br>(+)          | <i>Pseudomonas caricapapayae</i> LMG 2152T HAM                    | 1.902          | <a href="#">46678</a>  |
| 5<br>(+)          | <i>Pseudomonas syringae</i> ssp <i>syringae</i> DSM 6693 HAM      | 1.889          | <a href="#">317</a>    |
| 6<br>(+)          | 2502                                                              | 1.884          | <a href="#">451320</a> |
| 7<br>(+)          | <i>Pseudomonas avellanae</i> DSM 11809T DSM                       | 1.842          | <a href="#">46257</a>  |
| 8<br>(+)          | <i>Pseudomonas agarici</i> DSM 11810T HAM                         | 1.823          | <a href="#">46677</a>  |
| 9<br>(+)          | <a href="#">Pseudomonas congelans DSM 14939T HAM</a>              | 1.751          | <a href="#">200452</a> |
| 10<br>(-)         | <i>Pseudomonas cichorii</i> DSM 50259T HAM                        | 1.681          | <a href="#">36746</a>  |

**Analyte17**

Analyte Name: B5  
 Analyte Description:  
 Analyte ID: 17  
 Analyte Creation Date/Time: 2021-11-19T14:09:11.010  
 Applied MSP Library(ies):  
 Applied Taxonomy Tree: Bruker Taxonomy, Projects

| Rank<br>(Quality) | Matched Pattern                                                   | Score<br>Value | NCBI<br>Identifier     |
|-------------------|-------------------------------------------------------------------|----------------|------------------------|
| 1<br>(+++)        | <i>Pseudomonas savastanoi</i> ssp <i>savastanoi</i> LMG 2209T HAM | 2.335          | <a href="#">29438</a>  |
| 2<br>(++)         | <i>Pseudomonas savastanoi</i> ssp <i>savastanoi</i> LMG 5011 HAM  | 2.183          | <a href="#">29438</a>  |
| 3<br>(++)         | 2501                                                              | 2.069          | <a href="#">451320</a> |
| 4<br>(++)         | <i>Pseudomonas caricapapayae</i> LMG 2152T HAM                    | 2.034          | <a href="#">46678</a>  |
| 5<br>(+)          | 2502                                                              | 1.98           | <a href="#">451320</a> |
| 6<br>(+)          | <i>Pseudomonas syringae</i> ssp <i>syringae</i> DSM 6693 HAM      | 1.925          | <a href="#">317</a>    |
| 7<br>(+)          | <a href="#">Pseudomonas congelans DSM 14939T HAM</a>              | 1.912          | <a href="#">200452</a> |
| 8<br>(+)          | <i>Pseudomonas avellanae</i> DSM 11809T DSM                       | 1.876          | <a href="#">46257</a>  |
| 9<br>(+)          | <i>Pseudomonas agarici</i> DSM 11810T HAM                         | 1.805          | <a href="#">46677</a>  |
| 10<br>(+)         | <i>Pseudomonas syringae</i> ssp <i>syringae</i> LMG 1247T HAM     | 1.725          | <a href="#">317</a>    |

**Analyte18**

Analyte Name: B6  
 Analyte Description:  
 Analyte ID: 18  
 Analyte Creation Date/Time: 2021-11-19T14:09:10.104  
 Applied MSP Library(ies):  
 Applied Taxonomy Tree: Projects, Bruker Taxonomy

| Rank<br>(Quality) | Matched Pattern                                                        | Score<br>Value | NCBI<br>Identifier     |
|-------------------|------------------------------------------------------------------------|----------------|------------------------|
| 1<br>(++)         | <i>Pseudomonas savastanoi</i> ssp <i>savastanoi</i> LMG 2209T HAM      | 2.238          | <a href="#">29438</a>  |
| 2<br>(++)         | <i>Pseudomonas savastanoi</i> ssp <i>savastanoi</i> LMG 5011 HAM       | 2.125          | <a href="#">29438</a>  |
| 3<br>(++)         | <i>Pseudomonas caricapapayae</i> LMG 2152T HAM                         | 2              | <a href="#">46678</a>  |
| 4<br>(+)          | <i>Pseudomonas syringae</i> ssp <i>syringae</i> DSM 6693 HAM           | 1.922          | <a href="#">317</a>    |
| 5<br>(+)          | 2501                                                                   | 1.865          | <a href="#">451320</a> |
| 6<br>(+)          | <a href="#">Pseudomonas congelans DSM 14939T HAM</a>                   | 1.844          | <a href="#">200452</a> |
| 7<br>(+)          | <i>Pseudomonas avellanae</i> DSM 11809T DSM                            | 1.827          | <a href="#">46257</a>  |
| 8<br>(+)          | <i>Pseudomonas agarici</i> DSM 11810T HAM                              | 1.788          | <a href="#">46677</a>  |
| 9<br>(+)          | <i>Pseudomonas cichorii</i> DSM 50259T HAM                             | 1.786          | <a href="#">36746</a>  |
| 10<br>(+)         | <i>Pseudomonas chlororaphis</i> ssp <i>chlororaphis</i> DSM 50083T HAM | 1.761          | <a href="#">333</a>    |

**Analyte19**

Analyte Name: B7  
 Analyte Description:  
 Analyte ID: 19  
 Analyte Creation Date/Time: 2021-11-19T14:09:09.351  
 Applied MSP Library(ies):  
 Applied Taxonomy Tree: Projects, Bruker Taxonomy

| Rank<br>(Quality) | Matched Pattern                                                   | Score<br>Value | NCBI<br>Identifier     |
|-------------------|-------------------------------------------------------------------|----------------|------------------------|
| 1<br>(++)         | <i>Pseudomonas savastanoi</i> ssp <i>savastanoi</i> LMG 2209T HAM | 2.294          | <a href="#">29438</a>  |
| 2<br>(++)         | <i>Pseudomonas savastanoi</i> ssp <i>savastanoi</i> LMG 5011 HAM  | 2.214          | <a href="#">29438</a>  |
| 3<br>(+)          | <i>Pseudomonas caricapapayae</i> LMG 2152T HAM                    | 1.996          | <a href="#">46678</a>  |
| 4<br>(+)          | <i>Pseudomonas syringae</i> ssp <i>syringae</i> DSM 6693 HAM      | 1.909          | <a href="#">317</a>    |
| 5<br>(+)          | <a href="#">Pseudomonas congelans DSM 14939T HAM</a>              | 1.84           | <a href="#">200452</a> |
| 6<br>(+)          | <i>Pseudomonas avellanae</i> DSM 11809T DSM                       | 1.834          | <a href="#">46257</a>  |
| 7<br>(+)          | <i>Pseudomonas agarici</i> DSM 11810T HAM                         | 1.827          | <a href="#">46677</a>  |
| 8<br>(+)          | 2502                                                              | 1.755          | <a href="#">451320</a> |
| 9<br>(+)          | 2501                                                              | 1.754          | <a href="#">451320</a> |
| 10<br>(+)         | <i>Pseudomonas cichorii</i> DSM 50259T HAM                        | 1.733          | <a href="#">36746</a>  |

**Analyte20**

Analyte Name: B8  
 Analyte Description:  
 Analyte ID: 20  
 Analyte Creation Date/Time: 2021-11-19T14:09:09.309  
 Applied MSP Library(ies):  
 Applied Taxonomy Tree: Projects, Bruker Taxonomy

| Rank<br>(Quality) | Matched Pattern                                                   | Score<br>Value | NCBI<br>Identifier     |
|-------------------|-------------------------------------------------------------------|----------------|------------------------|
| 1<br>(+++)        | <i>Pseudomonas savastanoi</i> ssp <i>savastanoi</i> LMG 2209T HAM | 2.37           | <a href="#">29438</a>  |
| 2<br>(++)         | <i>Pseudomonas savastanoi</i> ssp <i>savastanoi</i> LMG 5011 HAM  | 2.228          | <a href="#">29438</a>  |
| 3<br>(++)         | <i>Pseudomonas caricapapayae</i> LMG 2152T HAM                    | 2.082          | <a href="#">46678</a>  |
| 4<br>(+)          | <i>Pseudomonas syringae</i> ssp <i>syringae</i> DSM 6693 HAM      | 1.99           | <a href="#">317</a>    |
| 5<br>(+)          | 2502                                                              | 1.979          | <a href="#">451320</a> |
| 6<br>(+)          | 2501                                                              | 1.95           | <a href="#">451320</a> |
| 7<br>(+)          | <i>Pseudomonas avellanae</i> DSM 11809T DSM                       | 1.902          | <a href="#">46257</a>  |
| 8<br>(+)          | <a href="#">Pseudomonas congelans DSM 14939T HAM</a>              | 1.878          | <a href="#">200452</a> |
| 9<br>(+)          | <i>Pseudomonas agarici</i> DSM 11810T HAM                         | 1.792          | <a href="#">46677</a>  |
| 10<br>(+)         | <i>Pseudomonas cichorii</i> DSM 50259T HAM                        | 1.759          | <a href="#">36746</a>  |

**Analyte21**

Analyte Name: B9  
 Analyte Description:  
 Analyte ID: 21  
 Analyte Creation Date/Time: 2021-11-19T14:09:10.213  
 Applied MSP Library(ies):  
 Applied Taxonomy Tree: Projects, Bruker Taxonomy

| Rank<br>(Quality) | Matched Pattern                                                        | Score<br>Value | NCBI<br>Identifier     |
|-------------------|------------------------------------------------------------------------|----------------|------------------------|
| 1<br>(++)         | <i>Pseudomonas savastanoi</i> ssp <i>savastanoi</i> LMG 2209T HAM      | 2.243          | <a href="#">29438</a>  |
| 2<br>(++)         | <i>Pseudomonas savastanoi</i> ssp <i>savastanoi</i> LMG 5011 HAM       | 2.173          | <a href="#">29438</a>  |
| 3<br>(++)         | <i>Pseudomonas caricapapayae</i> LMG 2152T HAM                         | 2.013          | <a href="#">46678</a>  |
| 4<br>(+)          | <i>Pseudomonas syringae</i> ssp <i>syringae</i> DSM 6693 HAM           | 1.947          | <a href="#">317</a>    |
| 5<br>(+)          | <i>Pseudomonas agarici</i> DSM 11810T HAM                              | 1.876          | <a href="#">46677</a>  |
| 6<br>(+)          | <a href="#">Pseudomonas congelans DSM 14939T HAM</a>                   | 1.859          | <a href="#">200452</a> |
| 7<br>(+)          | <i>Pseudomonas cichorii</i> DSM 50259T HAM                             | 1.784          | <a href="#">36746</a>  |
| 8<br>(+)          | <i>Pseudomonas chlororaphis</i> ssp <i>chlororaphis</i> DSM 50083T HAM | 1.764          | <a href="#">333</a>    |
| 9<br>(+)          | 2501                                                                   | 1.739          | <a href="#">451320</a> |
| 10<br>(+)         | <i>Pseudomonas avellanae</i> DSM 11809T DSM                            | 1.712          | <a href="#">46257</a>  |

**Analyte22**

Analyte Name: B10  
 Analyte Description:  
 Analyte ID: 22  
 Analyte Creation Date/Time: 2021-11-19T14:09:10.475  
 Applied MSP Library(ies):  
 Applied Taxonomy Tree: Projects, Bruker Taxonomy

| Rank<br>(Quality) | Matched Pattern                                                        | Score<br>Value | NCBI<br>Identifier     |
|-------------------|------------------------------------------------------------------------|----------------|------------------------|
| 1<br>(++)         | <i>Pseudomonas savastanoi</i> ssp <i>savastanoi</i> LMG 2209T HAM      | 2.267          | <a href="#">29438</a>  |
| 2<br>(++)         | <i>Pseudomonas savastanoi</i> ssp <i>savastanoi</i> LMG 5011 HAM       | 2.162          | <a href="#">29438</a>  |
| 3<br>(++)         | <i>Pseudomonas caricapapayae</i> LMG 2152T HAM                         | 2.003          | <a href="#">46678</a>  |
| 4<br>(+)          | <i>Pseudomonas syringae</i> ssp <i>syringae</i> DSM 6693 HAM           | 1.924          | <a href="#">317</a>    |
| 5<br>(+)          | <a href="#">Pseudomonas congelans DSM 14939T HAM</a>                   | 1.81           | <a href="#">200452</a> |
| 6<br>(+)          | <i>Pseudomonas avellanae</i> DSM 11809T DSM                            | 1.758          | <a href="#">46257</a>  |
| 7<br>(+)          | <i>Pseudomonas agarici</i> DSM 11810T HAM                              | 1.754          | <a href="#">46677</a>  |
| 8<br>(+)          | 2501                                                                   | 1.719          | <a href="#">451320</a> |
| 9<br>(+)          | <i>Pseudomonas chlororaphis</i> ssp <i>chlororaphis</i> DSM 50083T HAM | 1.712          | <a href="#">333</a>    |
| 10<br>(-)         | <i>Pseudomonas syringae</i> ssp <i>syringae</i> LMG 1247T HAM          | 1.586          | <a href="#">317</a>    |

**Analyte23**

Analyte Name: B11  
 Analyte Description:  
 Analyte ID: 23  
 Analyte Creation Date/Time: 2021-11-19T14:09:10.506  
 Applied MSP Library(ies):  
 Applied Taxonomy Tree: Projects, Bruker Taxonomy

| Rank<br>(Quality) | Matched Pattern                                                       | Score<br>Value | NCBI<br>Identifier     |
|-------------------|-----------------------------------------------------------------------|----------------|------------------------|
| 1<br>(+++)        | <i>Pseudomonas savastanoi</i> ssp <i>savastanoi</i> LMG 2209T HAM     | 2.383          | <a href="#">29438</a>  |
| 2<br>(++)         | <i>Pseudomonas savastanoi</i> ssp <i>savastanoi</i> LMG 5011 HAM      | 2.143          | <a href="#">29438</a>  |
| 3<br>(+)          | 2501                                                                  | 1.953          | <a href="#">451320</a> |
| 4<br>(+)          | <i>Pseudomonas caricapapayae</i> LMG 2152T HAM                        | 1.936          | <a href="#">46678</a>  |
| 5<br>(+)          | <a href="#">Pseudomonas congelans DSM 14939T HAM</a>                  | 1.863          | <a href="#">200452</a> |
| 6<br>(+)          | <i>Pseudomonas syringae</i> ssp <i>syringae</i> DSM 6693 HAM          | 1.861          | <a href="#">317</a>    |
| 7<br>(+)          | 2502                                                                  | 1.849          | <a href="#">451320</a> |
| 8<br>(+)          | <i>Pseudomonas avellanae</i> DSM 11809T DSM                           | 1.847          | <a href="#">46257</a>  |
| 9<br>(+)          | <i>Pseudomonas agarici</i> DSM 11810T HAM                             | 1.835          | <a href="#">46677</a>  |
| 10<br>(-)         | <i>Pseudomonas chlororaphis</i> ssp <i>aurantiaca</i> CIP 106718T HAM | 1.604          | <a href="#">333</a>    |

**Analyte24**

Analyte Name: B12  
 Analyte Description:  
 Analyte ID: 24  
 Analyte Creation Date/Time: 2021-11-19T14:09:10.969  
 Applied MSP Library(ies):  
 Applied Taxonomy Tree: Projects, Bruker Taxonomy

| Rank<br>(Quality) | Matched Pattern                                                   | Score<br>Value | NCBI<br>Identifier     |
|-------------------|-------------------------------------------------------------------|----------------|------------------------|
| 1<br>(+++)        | <i>Pseudomonas savastanoi</i> ssp <i>savastanoi</i> LMG 2209T HAM | 2.308          | <a href="#">29438</a>  |
| 2<br>(++)         | <i>Pseudomonas savastanoi</i> ssp <i>savastanoi</i> LMG 5011 HAM  | 2.194          | <a href="#">29438</a>  |
| 3<br>(+)          | <i>Pseudomonas syringae</i> ssp <i>syringae</i> DSM 6693 HAM      | 1.929          | <a href="#">317</a>    |
| 4<br>(+)          | <i>Pseudomonas caricapapayae</i> LMG 2152T HAM                    | 1.919          | <a href="#">46678</a>  |
| 5<br>(+)          | <i>Pseudomonas agarici</i> DSM 11810T HAM                         | 1.909          | <a href="#">46677</a>  |
| 6<br>(+)          | 2501                                                              | 1.848          | <a href="#">451320</a> |
| 7<br>(+)          | <a href="#">Pseudomonas congelans DSM 14939T HAM</a>              | 1.803          | <a href="#">200452</a> |
| 8<br>(+)          | 2502                                                              | 1.794          | <a href="#">451320</a> |
| 9<br>(+)          | <i>Pseudomonas syringae</i> ssp <i>syringae</i> LMG 1247T HAM     | 1.73           | <a href="#">317</a>    |
| 10<br>(-)         | <i>Pseudomonas avellanae</i> DSM 11809T DSM                       | 1.649          | <a href="#">46257</a>  |

**Analyte25**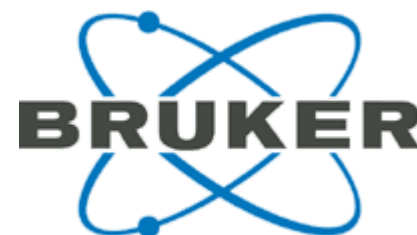

Analyte Name: C1  
 Analyte Description:  
 Analyte ID: 25  
 Analyte Creation Date/Time: 2021-11-19T14:09:10.406  
 Applied MSP Library(ies):  
 Applied Taxonomy Tree: Projects, Bruker Taxonomy

| Rank<br>(Quality) | Matched Pattern                                                   | Score<br>Value | NCBI<br>Identifier     |
|-------------------|-------------------------------------------------------------------|----------------|------------------------|
| 1<br>(+++)        | <i>Pseudomonas savastanoi</i> ssp <i>savastanoi</i> LMG 2209T HAM | 2.314          | <a href="#">29438</a>  |
| 2<br>(++)         | <i>Pseudomonas savastanoi</i> ssp <i>savastanoi</i> LMG 5011 HAM  | 2.246          | <a href="#">29438</a>  |
| 3<br>(+)          | <i>Pseudomonas syringae</i> ssp <i>syringae</i> DSM 6693 HAM      | 1.986          | <a href="#">317</a>    |
| 4<br>(+)          | <i>Pseudomonas caricapapayae</i> LMG 2152T HAM                    | 1.975          | <a href="#">46678</a>  |
| 5<br>(+)          | 2501                                                              | 1.962          | <a href="#">451320</a> |
| 6<br>(+)          | 2502                                                              | 1.86           | <a href="#">451320</a> |
| 7<br>(+)          | <a href="#">Pseudomonas congelans DSM 14939T HAM</a>              | 1.779          | <a href="#">200452</a> |
| 8<br>(+)          | <i>Pseudomonas viridiflava</i> DSM 11124T HAM                     | 1.753          | <a href="#">33069</a>  |
| 9<br>(+)          | <i>Pseudomonas syringae</i> ssp <i>syringae</i> LMG 1247T HAM     | 1.733          | <a href="#">317</a>    |
| 10<br>(+)         | <i>Pseudomonas agarici</i> DSM 11810T HAM                         | 1.716          | <a href="#">46677</a>  |

**Analyte26**

Analyte Name: C2  
 Analyte Description:  
 Analyte ID: 26  
 Analyte Creation Date/Time: 2021-11-19T14:09:10.046  
 Applied MSP Library(ies):  
 Applied Taxonomy Tree: Projects, Bruker Taxonomy

| Rank<br>(Quality) | Matched Pattern                                                   | Score<br>Value | NCBI<br>Identifier     |
|-------------------|-------------------------------------------------------------------|----------------|------------------------|
| 1<br>(++)         | <i>Pseudomonas savastanoi</i> ssp <i>savastanoi</i> LMG 2209T HAM | 2.289          | <a href="#">29438</a>  |
| 2<br>(++)         | <i>Pseudomonas savastanoi</i> ssp <i>savastanoi</i> LMG 5011 HAM  | 2.095          | <a href="#">29438</a>  |
| 3<br>(+)          | <i>Pseudomonas caricapapayae</i> LMG 2152T HAM                    | 1.946          | <a href="#">46678</a>  |
| 4<br>(+)          | 2501                                                              | 1.922          | <a href="#">451320</a> |
| 5<br>(+)          | <i>Pseudomonas syringae</i> ssp <i>syringae</i> DSM 6693 HAM      | 1.89           | <a href="#">317</a>    |
| 6<br>(+)          | 2502                                                              | 1.843          | <a href="#">451320</a> |
| 7<br>(+)          | <a href="#">Pseudomonas congelans DSM 14939T HAM</a>              | 1.843          | <a href="#">200452</a> |
| 8<br>(+)          | <i>Pseudomonas agarici</i> DSM 11810T HAM                         | 1.81           | <a href="#">46677</a>  |
| 9<br>(+)          | <i>Pseudomonas avellanae</i> DSM 11809T DSM                       | 1.739          | <a href="#">46257</a>  |
| 10<br>(-)         | <i>Pseudomonas syringae</i> ssp <i>syringae</i> LMG 1247T HAM     | 1.639          | <a href="#">317</a>    |

**Analyte27**

Analyte Name: C3  
 Analyte Description:  
 Analyte ID: 27  
 Analyte Creation Date/Time: 2021-11-19T14:09:10.171  
 Applied MSP Library(ies):  
 Applied Taxonomy Tree: Projects, Bruker Taxonomy

| Rank<br>(Quality) | Matched Pattern                                          | Score<br>Value | NCBI<br>Identifier     |
|-------------------|----------------------------------------------------------|----------------|------------------------|
| 1<br>(+++)        | Pseudomonas savastanoi ssp savastanoi LMG 2209T HAM      | 2.32           | <a href="#">29438</a>  |
| 2<br>(++)         | Pseudomonas savastanoi ssp savastanoi LMG 5011 HAM       | 2.188          | <a href="#">29438</a>  |
| 3<br>(+)          | Pseudomonas caricapapayae LMG 2152T HAM                  | 1.994          | <a href="#">46678</a>  |
| 4<br>(+)          | 2501                                                     | 1.906          | <a href="#">451320</a> |
| 5<br>(+)          | Pseudomonas syringae ssp syringae DSM 6693 HAM           | 1.884          | <a href="#">317</a>    |
| 6<br>(+)          | <a href="#">Pseudomonas congelans DSM 14939T HAM</a>     | 1.881          | <a href="#">200452</a> |
| 7<br>(+)          | Pseudomonas agarici DSM 11810T HAM                       | 1.873          | <a href="#">46677</a>  |
| 8<br>(+)          | Pseudomonas avellanae DSM 11809T DSM                     | 1.752          | <a href="#">46257</a>  |
| 9<br>(-)          | 2502                                                     | 1.692          | <a href="#">451320</a> |
| 10<br>(-)         | Pseudomonas chlororaphis ssp chlororaphis DSM 50083T HAM | 1.617          | <a href="#">333</a>    |

**Analyte28**

Analyte Name: C4  
 Analyte Description:  
 Analyte ID: 28  
 Analyte Creation Date/Time: 2021-11-19T14:09:10.565  
 Applied MSP Library(ies):  
 Applied Taxonomy Tree: Projects, Bruker Taxonomy

| Rank<br>(Quality) | Matched Pattern                                                   | Score<br>Value | NCBI<br>Identifier     |
|-------------------|-------------------------------------------------------------------|----------------|------------------------|
| 1<br>(++)         | <i>Pseudomonas savastanoi</i> ssp <i>savastanoi</i> LMG 2209T HAM | 2.257          | <a href="#">29438</a>  |
| 2<br>(++)         | <i>Pseudomonas savastanoi</i> ssp <i>savastanoi</i> LMG 5011 HAM  | 2.151          | <a href="#">29438</a>  |
| 3<br>(++)         | <i>Pseudomonas caricapapayae</i> LMG 2152T HAM                    | 2.025          | <a href="#">46678</a>  |
| 4<br>(+)          | <i>Pseudomonas syringae</i> ssp <i>syringae</i> DSM 6693 HAM      | 1.967          | <a href="#">317</a>    |
| 5<br>(+)          | 2501                                                              | 1.926          | <a href="#">451320</a> |
| 6<br>(+)          | 2502                                                              | 1.89           | <a href="#">451320</a> |
| 7<br>(+)          | <a href="#">Pseudomonas congelans DSM 14939T HAM</a>              | 1.847          | <a href="#">200452</a> |
| 8<br>(+)          | <i>Pseudomonas cichorii</i> DSM 50259T HAM                        | 1.812          | <a href="#">36746</a>  |
| 9<br>(+)          | <i>Pseudomonas agarici</i> DSM 11810T HAM                         | 1.736          | <a href="#">46677</a>  |
| 10<br>(+)         | <i>Pseudomonas avellanae</i> DSM 11809T DSM                       | 1.721          | <a href="#">46257</a>  |

**Analyte29**

Analyte Name: C5  
 Analyte Description:  
 Analyte ID: 29  
 Analyte Creation Date/Time: 2021-11-19T14:09:10.260  
 Applied MSP Library(ies):  
 Applied Taxonomy Tree: Projects, Bruker Taxonomy

| Rank<br>(Quality) | Matched Pattern                                          | Score<br>Value | NCBI<br>Identifier     |
|-------------------|----------------------------------------------------------|----------------|------------------------|
| 1<br>(++)         | Pseudomonas savastanoi ssp savastanoi LMG 2209T HAM      | 2.291          | <a href="#">29438</a>  |
| 2<br>(++)         | Pseudomonas savastanoi ssp savastanoi LMG 5011 HAM       | 2.183          | <a href="#">29438</a>  |
| 3<br>(+)          | Pseudomonas caricapapayae LMG 2152T HAM                  | 1.977          | <a href="#">46678</a>  |
| 4<br>(+)          | 2501                                                     | 1.932          | <a href="#">451320</a> |
| 5<br>(+)          | 2502                                                     | 1.914          | <a href="#">451320</a> |
| 6<br>(+)          | Pseudomonas syringae ssp syringae DSM 6693 HAM           | 1.823          | <a href="#">317</a>    |
| 7<br>(+)          | <a href="#">Pseudomonas congelans DSM 14939T HAM</a>     | 1.808          | <a href="#">200452</a> |
| 8<br>(+)          | Pseudomonas chlororaphis ssp chlororaphis DSM 50083T HAM | 1.798          | <a href="#">333</a>    |
| 9<br>(+)          | Pseudomonas agarici DSM 11810T HAM                       | 1.769          | <a href="#">46677</a>  |
| 10<br>(+)         | Pseudomonas avellanae DSM 11809T DSM                     | 1.733          | <a href="#">46257</a>  |

**Analyte30**

Analyte Name: C6  
 Analyte Description:  
 Analyte ID: 30  
 Analyte Creation Date/Time: 2021-11-19T14:09:10.792  
 Applied MSP Library(ies):  
 Applied Taxonomy Tree: Projects, Bruker Taxonomy

| Rank<br>(Quality) | Matched Pattern                                                        | Score<br>Value | NCBI<br>Identifier     |
|-------------------|------------------------------------------------------------------------|----------------|------------------------|
| 1<br>(++)         | <i>Pseudomonas savastanoi</i> ssp <i>savastanoi</i> LMG 2209T HAM      | 2.297          | <a href="#">29438</a>  |
| 2<br>(++)         | <i>Pseudomonas savastanoi</i> ssp <i>savastanoi</i> LMG 5011 HAM       | 2.249          | <a href="#">29438</a>  |
| 3<br>(++)         | <i>Pseudomonas caricapapayae</i> LMG 2152T HAM                         | 2.027          | <a href="#">46678</a>  |
| 4<br>(+)          | 2501                                                                   | 1.886          | <a href="#">451320</a> |
| 5<br>(+)          | <i>Pseudomonas syringae</i> ssp <i>syringae</i> DSM 6693 HAM           | 1.869          | <a href="#">317</a>    |
| 6<br>(+)          | 2502                                                                   | 1.85           | <a href="#">451320</a> |
| 7<br>(+)          | <a href="#">Pseudomonas congelans DSM 14939T HAM</a>                   | 1.848          | <a href="#">200452</a> |
| 8<br>(+)          | <i>Pseudomonas chlororaphis</i> ssp <i>chlororaphis</i> DSM 50083T HAM | 1.817          | <a href="#">333</a>    |
| 9<br>(+)          | <i>Pseudomonas avellanae</i> DSM 11809T DSM                            | 1.814          | <a href="#">46257</a>  |
| 10<br>(+)         | <i>Pseudomonas chlororaphis</i> ssp <i>aurantiaca</i> CIP 106718T HAM  | 1.756          | <a href="#">333</a>    |

**Analyte31**

Analyte Name: C7  
 Analyte Description:  
 Analyte ID: 31  
 Analyte Creation Date/Time: 2021-11-19T14:09:10.121  
 Applied MSP Library(ies):  
 Applied Taxonomy Tree: Projects, Bruker Taxonomy

| Rank<br>(Quality) | Matched Pattern                                      | Score<br>Value | NCBI<br>Identifier     |
|-------------------|------------------------------------------------------|----------------|------------------------|
| 1<br>(++)         | Pseudomonas savastanoi ssp savastanoi LMG 5011 HAM   | 2.276          | <a href="#">29438</a>  |
| 2<br>(++)         | Pseudomonas savastanoi ssp savastanoi LMG 2209T HAM  | 2.235          | <a href="#">29438</a>  |
| 3<br>(+)          | Pseudomonas caricapapayae LMG 2152T HAM              | 1.977          | <a href="#">46678</a>  |
| 4<br>(+)          | 2501                                                 | 1.959          | <a href="#">451320</a> |
| 5<br>(+)          | Pseudomonas syringae ssp syringae DSM 6693 HAM       | 1.941          | <a href="#">317</a>    |
| 6<br>(+)          | 2502                                                 | 1.913          | <a href="#">451320</a> |
| 7<br>(+)          | Pseudomonas avellanae DSM 11809T DSM                 | 1.875          | <a href="#">46257</a>  |
| 8<br>(+)          | <a href="#">Pseudomonas congelans DSM 14939T HAM</a> | 1.772          | <a href="#">200452</a> |
| 9<br>(+)          | Pseudomonas agarici DSM 11810T HAM                   | 1.76           | <a href="#">46677</a>  |
| 10<br>(+)         | Pseudomonas syringae ssp syringae LMG 1247T HAM      | 1.729          | <a href="#">317</a>    |

**Analyte32**

Analyte Name: C8  
 Analyte Description:  
 Analyte ID: 32  
 Analyte Creation Date/Time: 2021-11-19T14:09:10.347  
 Applied MSP Library(ies):  
 Applied Taxonomy Tree: Projects, Bruker Taxonomy

| Rank<br>(Quality) | Matched Pattern                                          | Score<br>Value | NCBI<br>Identifier     |
|-------------------|----------------------------------------------------------|----------------|------------------------|
| 1<br>(++)         | Pseudomonas savastanoi ssp savastanoi LMG 2209T HAM      | 2.297          | <a href="#">29438</a>  |
| 2<br>(++)         | Pseudomonas savastanoi ssp savastanoi LMG 5011 HAM       | 2.283          | <a href="#">29438</a>  |
| 3<br>(++)         | Pseudomonas caricapapayae LMG 2152T HAM                  | 2.071          | <a href="#">46678</a>  |
| 4<br>(+)          | Pseudomonas syringae ssp syringae DSM 6693 HAM           | 1.936          | <a href="#">317</a>    |
| 5<br>(+)          | <a href="#">Pseudomonas congelans DSM 14939T HAM</a>     | 1.905          | <a href="#">200452</a> |
| 6<br>(+)          | 2502                                                     | 1.894          | <a href="#">451320</a> |
| 7<br>(+)          | 2501                                                     | 1.845          | <a href="#">451320</a> |
| 8<br>(+)          | Pseudomonas avellanae DSM 11809T DSM                     | 1.766          | <a href="#">46257</a>  |
| 9<br>(+)          | Pseudomonas agarici DSM 11810T HAM                       | 1.705          | <a href="#">46677</a>  |
| 10<br>(-)         | Pseudomonas chlororaphis ssp chlororaphis DSM 50083T HAM | 1.696          | <a href="#">333</a>    |

**Analyte33**

Analyte Name: C9  
 Analyte Description:  
 Analyte ID: 33  
 Analyte Creation Date/Time: 2021-11-19T14:09:09.300  
 Applied MSP Library(ies):  
 Applied Taxonomy Tree: Projects, Bruker Taxonomy

| Rank<br>(Quality) | Matched Pattern                                                        | Score<br>Value | NCBI<br>Identifier     |
|-------------------|------------------------------------------------------------------------|----------------|------------------------|
| 1<br>(+++)        | <i>Pseudomonas savastanoi</i> ssp <i>savastanoi</i> LMG 2209T HAM      | 2.334          | <a href="#">29438</a>  |
| 2<br>(++)         | <i>Pseudomonas savastanoi</i> ssp <i>savastanoi</i> LMG 5011 HAM       | 2.238          | <a href="#">29438</a>  |
| 3<br>(++)         | <i>Pseudomonas caricapapayae</i> LMG 2152T HAM                         | 2.043          | <a href="#">46678</a>  |
| 4<br>(+)          | <i>Pseudomonas syringae</i> ssp <i>syringae</i> DSM 6693 HAM           | 1.922          | <a href="#">317</a>    |
| 5<br>(+)          | <a href="#">Pseudomonas congelans DSM 14939T HAM</a>                   | 1.905          | <a href="#">200452</a> |
| 6<br>(+)          | <i>Pseudomonas agarici</i> DSM 11810T HAM                              | 1.841          | <a href="#">46677</a>  |
| 7<br>(+)          | 2501                                                                   | 1.815          | <a href="#">451320</a> |
| 8<br>(+)          | 2502                                                                   | 1.799          | <a href="#">451320</a> |
| 9<br>(+)          | <i>Pseudomonas chlororaphis</i> ssp <i>chlororaphis</i> DSM 50083T HAM | 1.774          | <a href="#">333</a>    |
| 10<br>(+)         | <i>Pseudomonas cichorii</i> DSM 50259T HAM                             | 1.753          | <a href="#">36746</a>  |

**Analyte34**

Analyte Name: C10  
 Analyte Description:  
 Analyte ID: 34  
 Analyte Creation Date/Time: 2021-11-19T14:09:10.288  
 Applied MSP Library(ies):  
 Applied Taxonomy Tree: Projects, Bruker Taxonomy

| Rank<br>(Quality) | Matched Pattern                                          | Score<br>Value | NCBI<br>Identifier     |
|-------------------|----------------------------------------------------------|----------------|------------------------|
| 1<br>(++)         | Pseudomonas savastanoi ssp savastanoi LMG 2209T HAM      | 2.178          | <a href="#">29438</a>  |
| 2<br>(++)         | Pseudomonas savastanoi ssp savastanoi LMG 5011 HAM       | 2.143          | <a href="#">29438</a>  |
| 3<br>(+)          | 2501                                                     | 1.957          | <a href="#">451320</a> |
| 4<br>(+)          | Pseudomonas caricapapayae LMG 2152T HAM                  | 1.948          | <a href="#">46678</a>  |
| 5<br>(+)          | 2502                                                     | 1.845          | <a href="#">451320</a> |
| 6<br>(+)          | <a href="#">Pseudomonas congelans DSM 14939T HAM</a>     | 1.787          | <a href="#">200452</a> |
| 7<br>(+)          | Pseudomonas syringae ssp syringae DSM 6693 HAM           | 1.777          | <a href="#">317</a>    |
| 8<br>(+)          | Pseudomonas agarici DSM 11810T HAM                       | 1.753          | <a href="#">46677</a>  |
| 9<br>(-)          | Pseudomonas cichorii DSM 50259T HAM                      | 1.678          | <a href="#">36746</a>  |
| 10<br>(-)         | Pseudomonas chlororaphis ssp chlororaphis DSM 50083T HAM | 1.631          | <a href="#">333</a>    |

**Analyte35**

Analyte Name: C11  
 Analyte Description:  
 Analyte ID: 35  
 Analyte Creation Date/Time: 2021-11-19T14:09:09.644  
 Applied MSP Library(ies):  
 Applied Taxonomy Tree: Bruker Taxonomy, Projects

| Rank<br>(Quality) | Matched Pattern                                      | Score<br>Value | NCBI<br>Identifier     |
|-------------------|------------------------------------------------------|----------------|------------------------|
| 1<br>(++)         | Pseudomonas savastanoi ssp savastanoi LMG 2209T HAM  | 2.291          | <a href="#">29438</a>  |
| 2<br>(++)         | Pseudomonas savastanoi ssp savastanoi LMG 5011 HAM   | 2.167          | <a href="#">29438</a>  |
| 3<br>(++)         | Pseudomonas caricapapayae LMG 2152T HAM              | 2.034          | <a href="#">46678</a>  |
| 4<br>(+)          | Pseudomonas syringae ssp syringae DSM 6693 HAM       | 1.951          | <a href="#">317</a>    |
| 5<br>(+)          | 2501                                                 | 1.894          | <a href="#">451320</a> |
| 6<br>(+)          | <a href="#">Pseudomonas congelans DSM 14939T HAM</a> | 1.872          | <a href="#">200452</a> |
| 7<br>(+)          | 2502                                                 | 1.843          | <a href="#">451320</a> |
| 8<br>(+)          | Pseudomonas agarici DSM 11810T HAM                   | 1.77           | <a href="#">46677</a>  |
| 9<br>(+)          | Pseudomonas graminis DSM 11363T HAM                  | 1.713          | <a href="#">158627</a> |
| 10<br>(-)         | Pseudomonas syringae ssp syringae LMG 1247T HAM      | 1.688          | <a href="#">317</a>    |

**Analyte36**

Analyte Name: C12  
 Analyte Description:  
 Analyte ID: 36  
 Analyte Creation Date/Time: 2021-11-19T14:09:09.299  
 Applied MSP Library(ies):  
 Applied Taxonomy Tree: Projects, Bruker Taxonomy

| Rank<br>(Quality) | Matched Pattern                                                   | Score<br>Value | NCBI<br>Identifier     |
|-------------------|-------------------------------------------------------------------|----------------|------------------------|
| 1<br>(++)         | <i>Pseudomonas savastanoi</i> ssp <i>savastanoi</i> LMG 2209T HAM | 2.26           | <a href="#">29438</a>  |
| 2<br>(++)         | <i>Pseudomonas savastanoi</i> ssp <i>savastanoi</i> LMG 5011 HAM  | 2.169          | <a href="#">29438</a>  |
| 3<br>(+)          | <i>Pseudomonas syringae</i> ssp <i>syringae</i> DSM 6693 HAM      | 1.898          | <a href="#">317</a>    |
| 4<br>(+)          | 2501                                                              | 1.86           | <a href="#">451320</a> |
| 5<br>(+)          | <i>Pseudomonas caricapapayae</i> LMG 2152T HAM                    | 1.834          | <a href="#">46678</a>  |
| 6<br>(+)          | <i>Pseudomonas agarici</i> DSM 11810T HAM                         | 1.798          | <a href="#">46677</a>  |
| 7<br>(+)          | <a href="#">Pseudomonas congelans DSM 14939T HAM</a>              | 1.771          | <a href="#">200452</a> |
| 8<br>(-)          | <i>Pseudomonas avellanae</i> DSM 11809T DSM                       | 1.681          | <a href="#">46257</a>  |
| 9<br>(-)          | <i>Pseudomonas syringae</i> ssp <i>syringae</i> LMG 1247T HAM     | 1.625          | <a href="#">317</a>    |
| 10<br>(-)         | <i>Pseudomonas japonica</i> DSM 22348T DSM                        | 1.612          | <a href="#">256466</a> |

**Analyte37**

Analyte Name: D1  
 Analyte Description:  
 Analyte ID: 37  
 Analyte Creation Date/Time: 2021-11-19T14:09:10.052  
 Applied MSP Library(ies):  
 Applied Taxonomy Tree: Projects, Bruker Taxonomy

| <b>Rank<br/>(Quality)</b> | <b>Matched Pattern</b> | <b>Score<br/>Value</b> | <b>NCBI<br/>Identifier</b> |
|---------------------------|------------------------|------------------------|----------------------------|
| 1<br>(-)                  | no peaks found         | < 0                    | -                          |
| 2<br>(-)                  | no peaks found         | < 0                    | -                          |
| 3<br>(-)                  | no peaks found         | < 0                    | -                          |
| 4<br>(-)                  | no peaks found         | < 0                    | -                          |
| 5<br>(-)                  | no peaks found         | < 0                    | -                          |
| 6<br>(-)                  | no peaks found         | < 0                    | -                          |
| 7<br>(-)                  | no peaks found         | < 0                    | -                          |
| 8<br>(-)                  | no peaks found         | < 0                    | -                          |
| 9<br>(-)                  | no peaks found         | < 0                    | -                          |
| 10<br>(-)                 | no peaks found         | < 0                    | -                          |

**Analyte38**

Analyte Name: D2  
 Analyte Description:  
 Analyte ID: 38  
 Analyte Creation Date/Time: 2021-11-19T14:09:10.843  
 Applied MSP Library(ies):  
 Applied Taxonomy Tree: Projects, Bruker Taxonomy

| Rank<br>(Quality) | Matched Pattern                                                        | Score<br>Value | NCBI<br>Identifier     |
|-------------------|------------------------------------------------------------------------|----------------|------------------------|
| 1<br>(++)         | <i>Pseudomonas savastanoi</i> ssp <i>savastanoi</i> LMG 2209T HAM      | 2.265          | <a href="#">29438</a>  |
| 2<br>(++)         | <i>Pseudomonas savastanoi</i> ssp <i>savastanoi</i> LMG 5011 HAM       | 2.183          | <a href="#">29438</a>  |
| 3<br>(++)         | <i>Pseudomonas caricapapayae</i> LMG 2152T HAM                         | 2.088          | <a href="#">46678</a>  |
| 4<br>(+)          | 2501                                                                   | 1.953          | <a href="#">451320</a> |
| 5<br>(+)          | 2502                                                                   | 1.92           | <a href="#">451320</a> |
| 6<br>(+)          | <i>Pseudomonas syringae</i> ssp <i>syringae</i> DSM 6693 HAM           | 1.846          | <a href="#">317</a>    |
| 7<br>(+)          | <i>Pseudomonas avellanae</i> DSM 11809T DSM                            | 1.844          | <a href="#">46257</a>  |
| 8<br>(+)          | <a href="#">Pseudomonas congelans DSM 14939T HAM</a>                   | 1.773          | <a href="#">200452</a> |
| 9<br>(+)          | <i>Pseudomonas chlororaphis</i> ssp <i>chlororaphis</i> DSM 50083T HAM | 1.727          | <a href="#">333</a>    |
| 10<br>(+)         | <i>Pseudomonas agarici</i> DSM 11810T HAM                              | 1.721          | <a href="#">46677</a>  |

**Analyte39**

Analyte Name: D3  
 Analyte Description:  
 Analyte ID: 39  
 Analyte Creation Date/Time: 2021-11-19T14:09:10.255  
 Applied MSP Library(ies):  
 Applied Taxonomy Tree: Projects, Bruker Taxonomy

| Rank<br>(Quality) | Matched Pattern                                                       | Score<br>Value | NCBI<br>Identifier     |
|-------------------|-----------------------------------------------------------------------|----------------|------------------------|
| 1<br>(++)         | <i>Pseudomonas savastanoi</i> ssp <i>savastanoi</i> LMG 2209T HAM     | 2.256          | <a href="#">29438</a>  |
| 2<br>(++)         | <i>Pseudomonas savastanoi</i> ssp <i>savastanoi</i> LMG 5011 HAM      | 2.123          | <a href="#">29438</a>  |
| 3<br>(++)         | <i>Pseudomonas caricapapayae</i> LMG 2152T HAM                        | 2.026          | <a href="#">46678</a>  |
| 4<br>(++)         | 2501                                                                  | 2              | <a href="#">451320</a> |
| 5<br>(+)          | <i>Pseudomonas avellanae</i> DSM 11809T DSM                           | 1.9            | <a href="#">46257</a>  |
| 6<br>(+)          | <i>Pseudomonas syringae</i> ssp <i>syringae</i> DSM 6693 HAM          | 1.898          | <a href="#">317</a>    |
| 7<br>(+)          | <a href="#">Pseudomonas congelans DSM 14939T HAM</a>                  | 1.872          | <a href="#">200452</a> |
| 8<br>(+)          | 2502                                                                  | 1.848          | <a href="#">451320</a> |
| 9<br>(+)          | <i>Pseudomonas agarici</i> DSM 11810T HAM                             | 1.784          | <a href="#">46677</a>  |
| 10<br>(-)         | <i>Pseudomonas chlororaphis</i> ssp <i>aurantiaca</i> CIP 106718T HAM | 1.632          | <a href="#">333</a>    |

**Analyte40**

Analyte Name: D4  
 Analyte Description:  
 Analyte ID: 40  
 Analyte Creation Date/Time: 2021-11-19T14:09:09.919  
 Applied MSP Library(ies):  
 Applied Taxonomy Tree: Projects, Bruker Taxonomy

| Rank<br>(Quality) | Matched Pattern                                          | Score<br>Value | NCBI<br>Identifier     |
|-------------------|----------------------------------------------------------|----------------|------------------------|
| 1<br>(++)         | Pseudomonas savastanoi ssp savastanoi LMG 2209T HAM      | 2.278          | <a href="#">29438</a>  |
| 2<br>(++)         | Pseudomonas savastanoi ssp savastanoi LMG 5011 HAM       | 2.219          | <a href="#">29438</a>  |
| 3<br>(++)         | 2501                                                     | 2.045          | <a href="#">451320</a> |
| 4<br>(++)         | Pseudomonas caricapapayae LMG 2152T HAM                  | 2.032          | <a href="#">46678</a>  |
| 5<br>(+)          | 2502                                                     | 1.932          | <a href="#">451320</a> |
| 6<br>(+)          | <a href="#">Pseudomonas congelans DSM 14939T HAM</a>     | 1.85           | <a href="#">200452</a> |
| 7<br>(+)          | Pseudomonas syringae ssp syringae DSM 6693 HAM           | 1.833          | <a href="#">317</a>    |
| 8<br>(+)          | Pseudomonas avellanae DSM 11809T DSM                     | 1.805          | <a href="#">46257</a>  |
| 9<br>(+)          | Pseudomonas chlororaphis ssp chlororaphis DSM 50083T HAM | 1.767          | <a href="#">333</a>    |
| 10<br>(+)         | Pseudomonas chlororaphis ssp aurantiaca CIP 106718T HAM  | 1.761          | <a href="#">333</a>    |

**Analyte41**

Analyte Name: D5  
 Analyte Description:  
 Analyte ID: 41  
 Analyte Creation Date/Time: 2021-11-19T14:09:10.465  
 Applied MSP Library(ies):  
 Applied Taxonomy Tree: Projects, Bruker Taxonomy

| Rank<br>(Quality) | Matched Pattern                                                       | Score<br>Value | NCBI<br>Identifier     |
|-------------------|-----------------------------------------------------------------------|----------------|------------------------|
| 1<br>(+++)        | <i>Pseudomonas savastanoi</i> ssp <i>savastanoi</i> LMG 2209T HAM     | 2.369          | <a href="#">29438</a>  |
| 2<br>(++)         | <i>Pseudomonas savastanoi</i> ssp <i>savastanoi</i> LMG 5011 HAM      | 2.115          | <a href="#">29438</a>  |
| 3<br>(++)         | <i>Pseudomonas caricapapayae</i> LMG 2152T HAM                        | 2.019          | <a href="#">46678</a>  |
| 4<br>(+)          | 2501                                                                  | 1.891          | <a href="#">451320</a> |
| 5<br>(+)          | <a href="#">Pseudomonas congelans DSM 14939T HAM</a>                  | 1.888          | <a href="#">200452</a> |
| 6<br>(+)          | 2502                                                                  | 1.859          | <a href="#">451320</a> |
| 7<br>(+)          | <i>Pseudomonas syringae</i> ssp <i>syringae</i> DSM 6693 HAM          | 1.857          | <a href="#">317</a>    |
| 8<br>(+)          | <i>Pseudomonas agarici</i> DSM 11810T HAM                             | 1.769          | <a href="#">46677</a>  |
| 9<br>(+)          | <i>Pseudomonas avellanae</i> DSM 11809T DSM                           | 1.76           | <a href="#">46257</a>  |
| 10<br>(+)         | <i>Pseudomonas chlororaphis</i> ssp <i>aurantiaca</i> CIP 106718T HAM | 1.708          | <a href="#">333</a>    |

**Analyte42**

Analyte Name: D6  
 Analyte Description:  
 Analyte ID: 42  
 Analyte Creation Date/Time: 2021-11-19T14:09:09.833  
 Applied MSP Library(ies):  
 Applied Taxonomy Tree: Projects, Bruker Taxonomy

| Rank<br>(Quality) | Matched Pattern                                                       | Score<br>Value | NCBI<br>Identifier     |
|-------------------|-----------------------------------------------------------------------|----------------|------------------------|
| 1<br>(++)         | <i>Pseudomonas savastanoi</i> ssp <i>savastanoi</i> LMG 2209T HAM     | 2.283          | <a href="#">29438</a>  |
| 2<br>(++)         | <i>Pseudomonas savastanoi</i> ssp <i>savastanoi</i> LMG 5011 HAM      | 2.061          | <a href="#">29438</a>  |
| 3<br>(+)          | <i>Pseudomonas caricapapayae</i> LMG 2152T HAM                        | 1.973          | <a href="#">46678</a>  |
| 4<br>(+)          | 2501                                                                  | 1.957          | <a href="#">451320</a> |
| 5<br>(+)          | 2502                                                                  | 1.939          | <a href="#">451320</a> |
| 6<br>(+)          | <i>Pseudomonas avellanae</i> DSM 11809T DSM                           | 1.908          | <a href="#">46257</a>  |
| 7<br>(+)          | <a href="#">Pseudomonas congelans DSM 14939T HAM</a>                  | 1.839          | <a href="#">200452</a> |
| 8<br>(+)          | <i>Pseudomonas syringae</i> ssp <i>syringae</i> DSM 6693 HAM          | 1.81           | <a href="#">317</a>    |
| 9<br>(+)          | <i>Pseudomonas agarici</i> DSM 11810T HAM                             | 1.808          | <a href="#">46677</a>  |
| 10<br>(+)         | <i>Pseudomonas chlororaphis</i> ssp <i>aurantiaca</i> CIP 106718T HAM | 1.711          | <a href="#">333</a>    |

**Analyte43**

Analyte Name: D7  
 Analyte Description:  
 Analyte ID: 43  
 Analyte Creation Date/Time: 2021-11-19T14:09:10.940  
 Applied MSP Library(ies):  
 Applied Taxonomy Tree: Bruker Taxonomy, Projects

| Rank<br>(Quality) | Matched Pattern                                          | Score<br>Value | NCBI<br>Identifier     |
|-------------------|----------------------------------------------------------|----------------|------------------------|
| 1<br>(+++)        | Pseudomonas savastanoi ssp savastanoi LMG 2209T HAM      | 2.351          | <a href="#">29438</a>  |
| 2<br>(++)         | Pseudomonas savastanoi ssp savastanoi LMG 5011 HAM       | 2.183          | <a href="#">29438</a>  |
| 3<br>(++)         | Pseudomonas caricapapayae LMG 2152T HAM                  | 2.026          | <a href="#">46678</a>  |
| 4<br>(+)          | Pseudomonas syringae ssp syringae DSM 6693 HAM           | 1.952          | <a href="#">317</a>    |
| 5<br>(+)          | <a href="#">Pseudomonas congelans DSM 14939T HAM</a>     | 1.904          | <a href="#">200452</a> |
| 6<br>(+)          | 2502                                                     | 1.852          | <a href="#">451320</a> |
| 7<br>(+)          | 2501                                                     | 1.836          | <a href="#">451320</a> |
| 8<br>(+)          | Pseudomonas agarici DSM 11810T HAM                       | 1.782          | <a href="#">46677</a>  |
| 9<br>(+)          | Pseudomonas viridiflava DSM 11124T HAM                   | 1.743          | <a href="#">33069</a>  |
| 10<br>(+)         | Pseudomonas chlororaphis ssp chlororaphis DSM 50083T HAM | 1.734          | <a href="#">333</a>    |

**Analyte44**

Analyte Name: D8  
 Analyte Description:  
 Analyte ID: 44  
 Analyte Creation Date/Time: 2021-11-19T14:09:10.767  
 Applied MSP Library(ies):  
 Applied Taxonomy Tree: Projects, Bruker Taxonomy

| Rank<br>(Quality) | Matched Pattern                                                        | Score<br>Value | NCBI<br>Identifier     |
|-------------------|------------------------------------------------------------------------|----------------|------------------------|
| 1<br>(+++)        | <i>Pseudomonas savastanoi</i> ssp <i>savastanoi</i> LMG 2209T HAM      | 2.347          | <a href="#">29438</a>  |
| 2<br>(++)         | <i>Pseudomonas savastanoi</i> ssp <i>savastanoi</i> LMG 5011 HAM       | 2.173          | <a href="#">29438</a>  |
| 3<br>(++)         | <i>Pseudomonas caricapapayae</i> LMG 2152T HAM                         | 2.008          | <a href="#">46678</a>  |
| 4<br>(+)          | 2502                                                                   | 1.878          | <a href="#">451320</a> |
| 5<br>(+)          | <i>Pseudomonas syringae</i> ssp <i>syringae</i> DSM 6693 HAM           | 1.854          | <a href="#">317</a>    |
| 6<br>(+)          | <a href="#">Pseudomonas congelans DSM 14939T HAM</a>                   | 1.844          | <a href="#">200452</a> |
| 7<br>(+)          | <i>Pseudomonas agarici</i> DSM 11810T HAM                              | 1.807          | <a href="#">46677</a>  |
| 8<br>(+)          | 2501                                                                   | 1.787          | <a href="#">451320</a> |
| 9<br>(+)          | <i>Pseudomonas avellanae</i> DSM 11809T DSM                            | 1.724          | <a href="#">46257</a>  |
| 10<br>(-)         | <i>Pseudomonas chlororaphis</i> ssp <i>chlororaphis</i> DSM 50083T HAM | 1.67           | <a href="#">333</a>    |

**Analyte45**

Analyte Name: D9  
 Analyte Description:  
 Analyte ID: 45  
 Analyte Creation Date/Time: 2021-11-19T14:09:09.894  
 Applied MSP Library(ies):  
 Applied Taxonomy Tree: Bruker Taxonomy, Projects

| Rank<br>(Quality) | Matched Pattern                                                        | Score<br>Value | NCBI<br>Identifier     |
|-------------------|------------------------------------------------------------------------|----------------|------------------------|
| 1<br>(++)         | <i>Pseudomonas savastanoi</i> ssp <i>savastanoi</i> LMG 2209T HAM      | 2.228          | <a href="#">29438</a>  |
| 2<br>(++)         | <i>Pseudomonas savastanoi</i> ssp <i>savastanoi</i> LMG 5011 HAM       | 2.113          | <a href="#">29438</a>  |
| 3<br>(++)         | <i>Pseudomonas caricapapayae</i> LMG 2152T HAM                         | 2.034          | <a href="#">46678</a>  |
| 4<br>(+)          | 2501                                                                   | 1.995          | <a href="#">451320</a> |
| 5<br>(+)          | <a href="#">Pseudomonas congelans DSM 14939T HAM</a>                   | 1.834          | <a href="#">200452</a> |
| 6<br>(+)          | 2502                                                                   | 1.83           | <a href="#">451320</a> |
| 7<br>(+)          | <i>Pseudomonas syringae</i> ssp <i>syringae</i> DSM 6693 HAM           | 1.772          | <a href="#">317</a>    |
| 8<br>(+)          | <i>Pseudomonas chlororaphis</i> ssp <i>chlororaphis</i> DSM 50083T HAM | 1.711          | <a href="#">333</a>    |
| 9<br>(+)          | <i>Pseudomonas cichorii</i> DSM 50259T HAM                             | 1.706          | <a href="#">36746</a>  |
| 10<br>(+)         | <i>Pseudomonas avellanae</i> DSM 11809T DSM                            | 1.705          | <a href="#">46257</a>  |

**Analyte46**

Analyte Name: D10  
 Analyte Description:  
 Analyte ID: 46  
 Analyte Creation Date/Time: 2021-11-19T14:09:09.787  
 Applied MSP Library(ies):  
 Applied Taxonomy Tree: Projects, Bruker Taxonomy

| Rank<br>(Quality) | Matched Pattern                                      | Score<br>Value | NCBI<br>Identifier     |
|-------------------|------------------------------------------------------|----------------|------------------------|
| 1<br>(+++)        | Pseudomonas savastanoi ssp savastanoi LMG 2209T HAM  | 2.357          | <a href="#">29438</a>  |
| 2<br>(++)         | Pseudomonas savastanoi ssp savastanoi LMG 5011 HAM   | 2.168          | <a href="#">29438</a>  |
| 3<br>(++)         | Pseudomonas caricapapayae LMG 2152T HAM              | 2.08           | <a href="#">46678</a>  |
| 4<br>(++)         | 2501                                                 | 2.009          | <a href="#">451320</a> |
| 5<br>(+)          | 2502                                                 | 1.95           | <a href="#">451320</a> |
| 6<br>(+)          | <a href="#">Pseudomonas congelans DSM 14939T HAM</a> | 1.856          | <a href="#">200452</a> |
| 7<br>(+)          | Pseudomonas agarici DSM 11810T HAM                   | 1.825          | <a href="#">46677</a>  |
| 8<br>(+)          | Pseudomonas avellanae DSM 11809T DSM                 | 1.809          | <a href="#">46257</a>  |
| 9<br>(+)          | Pseudomonas syringae ssp syringae DSM 6693 HAM       | 1.8            | <a href="#">317</a>    |
| 10<br>(-)         | Pseudomonas cichorii DSM 50259T HAM                  | 1.698          | <a href="#">36746</a>  |

**Analyte47**

Analyte Name: D11  
 Analyte Description:  
 Analyte ID: 47  
 Analyte Creation Date/Time: 2021-11-19T14:09:09.411  
 Applied MSP Library(ies):  
 Applied Taxonomy Tree: Projects, Bruker Taxonomy

| Rank<br>(Quality) | Matched Pattern                                          | Score<br>Value | NCBI<br>Identifier     |
|-------------------|----------------------------------------------------------|----------------|------------------------|
| 1<br>(+++)        | Pseudomonas savastanoi ssp savastanoi LMG 2209T HAM      | 2.325          | <a href="#">29438</a>  |
| 2<br>(++)         | Pseudomonas savastanoi ssp savastanoi LMG 5011 HAM       | 2.087          | <a href="#">29438</a>  |
| 3<br>(+)          | Pseudomonas caricapapayae LMG 2152T HAM                  | 1.965          | <a href="#">46678</a>  |
| 4<br>(+)          | 2501                                                     | 1.955          | <a href="#">451320</a> |
| 5<br>(+)          | Pseudomonas avellanae DSM 11809T DSM                     | 1.917          | <a href="#">46257</a>  |
| 6<br>(+)          | Pseudomonas syringae ssp syringae DSM 6693 HAM           | 1.853          | <a href="#">317</a>    |
| 7<br>(+)          | Pseudomonas agarici DSM 11810T HAM                       | 1.842          | <a href="#">46677</a>  |
| 8<br>(+)          | <a href="#">Pseudomonas congelans DSM 14939T HAM</a>     | 1.824          | <a href="#">200452</a> |
| 9<br>(+)          | 2502                                                     | 1.817          | <a href="#">451320</a> |
| 10<br>(-)         | Pseudomonas chlororaphis ssp chlororaphis DSM 50083T HAM | 1.692          | <a href="#">333</a>    |

**Analyte48**

Analyte Name: D12  
 Analyte Description:  
 Analyte ID: 48  
 Analyte Creation Date/Time: 2021-11-19T14:09:10.708  
 Applied MSP Library(ies):  
 Applied Taxonomy Tree: Projects, Bruker Taxonomy

| Rank<br>(Quality) | Matched Pattern                                                        | Score<br>Value | NCBI<br>Identifier     |
|-------------------|------------------------------------------------------------------------|----------------|------------------------|
| 1<br>(+++)        | <i>Pseudomonas savastanoi</i> ssp <i>savastanoi</i> LMG 2209T HAM      | 2.321          | <a href="#">29438</a>  |
| 2<br>(++)         | <i>Pseudomonas savastanoi</i> ssp <i>savastanoi</i> LMG 5011 HAM       | 2.078          | <a href="#">29438</a>  |
| 3<br>(++)         | <i>Pseudomonas caricapapayae</i> LMG 2152T HAM                         | 2.033          | <a href="#">46678</a>  |
| 4<br>(+)          | 2501                                                                   | 1.989          | <a href="#">451320</a> |
| 5<br>(+)          | <i>Pseudomonas syringae</i> ssp <i>syringae</i> DSM 6693 HAM           | 1.916          | <a href="#">317</a>    |
| 6<br>(+)          | 2502                                                                   | 1.882          | <a href="#">451320</a> |
| 7<br>(+)          | <a href="#">Pseudomonas congelans DSM 14939T HAM</a>                   | 1.882          | <a href="#">200452</a> |
| 8<br>(+)          | <i>Pseudomonas avellanae</i> DSM 11809T DSM                            | 1.845          | <a href="#">46257</a>  |
| 9<br>(+)          | <i>Pseudomonas agarici</i> DSM 11810T HAM                              | 1.844          | <a href="#">46677</a>  |
| 10<br>(-)         | <i>Pseudomonas chlororaphis</i> ssp <i>chlororaphis</i> DSM 50083T HAM | 1.682          | <a href="#">333</a>    |

**Analyte49**

Analyte Name: E1  
 Analyte Description:  
 Analyte ID: 49  
 Analyte Creation Date/Time: 2021-11-19T14:09:09.568  
 Applied MSP Library(ies):  
 Applied Taxonomy Tree: Projects, Bruker Taxonomy

| Rank<br>(Quality) | Matched Pattern                                      | Score<br>Value | NCBI<br>Identifier     |
|-------------------|------------------------------------------------------|----------------|------------------------|
| 1<br>(++)         | Pseudomonas savastanoi ssp savastanoi LMG 2209T HAM  | 2.289          | <a href="#">29438</a>  |
| 2<br>(++)         | Pseudomonas savastanoi ssp savastanoi LMG 5011 HAM   | 2.092          | <a href="#">29438</a>  |
| 3<br>(+)          | 2501                                                 | 1.925          | <a href="#">451320</a> |
| 4<br>(+)          | Pseudomonas syringae ssp syringae DSM 6693 HAM       | 1.904          | <a href="#">317</a>    |
| 5<br>(+)          | 2502                                                 | 1.886          | <a href="#">451320</a> |
| 6<br>(+)          | <a href="#">Pseudomonas congelans DSM 14939T HAM</a> | 1.859          | <a href="#">200452</a> |
| 7<br>(+)          | Pseudomonas caricapapayae LMG 2152T HAM              | 1.833          | <a href="#">46678</a>  |
| 8<br>(+)          | Pseudomonas avellanae DSM 11809T DSM                 | 1.769          | <a href="#">46257</a>  |
| 9<br>(+)          | Pseudomonas agarici DSM 11810T HAM                   | 1.761          | <a href="#">46677</a>  |
| 10<br>(-)         | Pseudomonas oleovorans ssp oleovorans DSM 50188 HAM  | 1.647          | <a href="#">301</a>    |

**Analyte50**

Analyte Name: E2  
 Analyte Description:  
 Analyte ID: 50  
 Analyte Creation Date/Time: 2021-11-19T14:09:10.640  
 Applied MSP Library(ies):  
 Applied Taxonomy Tree: Projects, Bruker Taxonomy

| Rank<br>(Quality) | Matched Pattern                                        | Score<br>Value | NCBI<br>Identifier     |
|-------------------|--------------------------------------------------------|----------------|------------------------|
| 1<br>(-)          | Curtobacterium flaccumfaciens DSM 20149 DSM            | 1.599          | <a href="#">2035</a>   |
| 2<br>(-)          | Curtobacterium albidum HKI 11500 HKJ                   | 1.377          | <a href="#">50728</a>  |
| 3<br>(-)          | Sphingobium cloacae DSM 14926T HAM                     | 1.278          | <a href="#">120107</a> |
| 4<br>(-)          | Staphylococcus lugdunensis DSM 4806 DSM                | 1.216          | <a href="#">28035</a>  |
| 5<br>(-)          | Paenibacillus chinjuensis DSM 15045T DSM               | 1.196          | <a href="#">103815</a> |
| 6<br>(-)          | Starkeya novella B351 UFL                              | 1.186          | <a href="#">921</a>    |
| 7<br>(-)          | Arthrobacter psychrolactophilus DSM 15612T DSM         | 1.184          | <a href="#">92442</a>  |
| 8<br>(-)          | Halococcus morrhuae B270 UFL                           | 1.182          | <a href="#">2250</a>   |
| 9<br>(-)          | Arthrobacter gandavensis DSM 15046T DSM                | 1.182          | <a href="#">169960</a> |
| 10<br>(-)         | Agromyces cerinus ssp nitratus HKI 11532_DSM 8596T HKJ | 1.173          | <a href="#">231391</a> |

**Analyte51**

Analyte Name: E3  
 Analyte Description:  
 Analyte ID: 51  
 Analyte Creation Date/Time: 2021-11-19T14:09:10.079  
 Applied MSP Library(ies):  
 Applied Taxonomy Tree: Projects, Bruker Taxonomy

| Rank<br>(Quality) | Matched Pattern                                                   | Score<br>Value | NCBI<br>Identifier     |
|-------------------|-------------------------------------------------------------------|----------------|------------------------|
| 1<br>(+++)        | <i>Pseudomonas savastanoi</i> ssp <i>savastanoi</i> LMG 2209T HAM | 2.361          | <a href="#">29438</a>  |
| 2<br>(++)         | <i>Pseudomonas savastanoi</i> ssp <i>savastanoi</i> LMG 5011 HAM  | 2.181          | <a href="#">29438</a>  |
| 3<br>(+)          | <i>Pseudomonas syringae</i> ssp <i>syringae</i> DSM 6693 HAM      | 1.923          | <a href="#">317</a>    |
| 4<br>(+)          | 2501                                                              | 1.922          | <a href="#">451320</a> |
| 5<br>(+)          | <i>Pseudomonas caricapapayae</i> LMG 2152T HAM                    | 1.9            | <a href="#">46678</a>  |
| 6<br>(+)          | <i>Pseudomonas avellanae</i> DSM 11809T DSM                       | 1.849          | <a href="#">46257</a>  |
| 7<br>(+)          | <a href="#">Pseudomonas congelans DSM 14939T HAM</a>              | 1.832          | <a href="#">200452</a> |
| 8<br>(+)          | 2502                                                              | 1.83           | <a href="#">451320</a> |
| 9<br>(+)          | <i>Pseudomonas agarici</i> DSM 11810T HAM                         | 1.782          | <a href="#">46677</a>  |
| 10<br>(-)         | <i>Pseudomonas cichorii</i> DSM 50259T HAM                        | 1.628          | <a href="#">36746</a>  |

**Analyte52**

Analyte Name: E4  
 Analyte Description:  
 Analyte ID: 52  
 Analyte Creation Date/Time: 2021-11-19T14:09:09.669  
 Applied MSP Library(ies):  
 Applied Taxonomy Tree: Projects, Bruker Taxonomy

| Rank<br>(Quality) | Matched Pattern                                         | Score<br>Value | NCBI<br>Identifier     |
|-------------------|---------------------------------------------------------|----------------|------------------------|
| 1<br>(-)          | Curtobacterium flaccumfaciens DSM 20149 DSM             | 1.604          | <a href="#">2035</a>   |
| 2<br>(-)          | Curtobacterium albidum HKI 11500 HKJ                    | 1.502          | <a href="#">50728</a>  |
| 3<br>(-)          | Paeniclostridium sordellii 1070_ATCC 9714T BOG          | 1.273          | <a href="#">1505</a>   |
| 4<br>(-)          | Agromyces humatus DSM 16389T DSM                        | 1.23           | <a href="#">279573</a> |
| 5<br>(-)          | Arthrobacter psychrolactophilus DSM 15612T DSM          | 1.229          | <a href="#">92442</a>  |
| 6<br>(-)          | Lactobacillus sharpeae DSM 20506 DSM                    | 1.219          | <a href="#">1626</a>   |
| 7<br>(-)          | <a href="#">Lactobacillus amylovorus DSM 20531T DSM</a> | 1.21           | <a href="#">1604</a>   |
| 8<br>(-)          | Lactobacillus paracasei ssp tolerans DSM 20012 DSM      | 1.209          | <a href="#">113557</a> |
| 9<br>(-)          | Staphylococcus lugdunensis DSM 4806 DSM                 | 1.185          | <a href="#">28035</a>  |
| 10<br>(-)         | Rhizobium radiobacter B167 UFL                          | 1.172          | <a href="#">358</a>    |

**Analyte53**

Analyte Name: E5  
 Analyte Description:  
 Analyte ID: 53  
 Analyte Creation Date/Time: 2021-11-19T14:09:10.599  
 Applied MSP Library(ies):  
 Applied Taxonomy Tree: Projects, Bruker Taxonomy

| Rank<br>(Quality) | Matched Pattern                                     | Score<br>Value | NCBI<br>Identifier     |
|-------------------|-----------------------------------------------------|----------------|------------------------|
| 1<br>(-)          | Curtobacterium flaccumfaciens DSM 20149 DSM         | 1.688          | <a href="#">2035</a>   |
| 2<br>(-)          | Agromyces humatus DSM 16389T DSM                    | 1.304          | <a href="#">279573</a> |
| 3<br>(-)          | Lactobacillus plantarum DSM 20246 DSM               | 1.27           | <a href="#">1590</a>   |
| 4<br>(-)          | Arthrobacter gandavensis DSM 15046T DSM             | 1.242          | <a href="#">169960</a> |
| 5<br>(-)          | Curtobacterium albidum HKI 11500 HKJ                | 1.232          | <a href="#">50728</a>  |
| 6<br>(-)          | Agromyces italicus HKI 325_DSM 16388T HKJ           | 1.215          | <a href="#">279572</a> |
| 7<br>(-)          | Chryseobacterium vrystaatense DSM 25206T DSM        | 1.196          | <a href="#">307480</a> |
| 8<br>(-)          | <a href="#">Citrobacter freundii 22054_1 CHB</a>    | 1.183          | <a href="#">546</a>    |
| 9<br>(-)          | Paraclostridium bifermentans 2273_CCUG 35297 BOG    | 1.175          | <a href="#">1490</a>   |
| 10<br>(-)         | Lactobacillus paracasei ssp paracasei DSM 20244 DSM | 1.172          | <a href="#">47714</a>  |

**Analyte54**

Analyte Name: E6  
 Analyte Description:  
 Analyte ID: 54  
 Analyte Creation Date/Time: 2021-11-19T14:09:10.322  
 Applied MSP Library(ies):  
 Applied Taxonomy Tree: Projects, Bruker Taxonomy

| Rank<br>(Quality) | Matched Pattern                                    | Score<br>Value | NCBI<br>Identifier        |
|-------------------|----------------------------------------------------|----------------|---------------------------|
| 1<br>(+++)        | <a href="#">Bacillus megaterium DSM 1668 DSM</a>   | 2.391          | <a href="#">1404</a>      |
| 2<br>(+++)        | <a href="#">Bacillus megaterium DSM 2894 DSM</a>   | 2.341          | <a href="#">1404</a>      |
| 3<br>(+++)        | <a href="#">Bacillus megaterium DSM 32T DSM</a>    | 2.326          | <a href="#">1404</a>      |
| 4<br>(-)          | <a href="#">Bacillus sonorensis DSM 13779T DSM</a> | 1.498          | <a href="#">119858</a>    |
| 5<br>(-)          | Rhizobium radiobacter B170 UFL                     | 1.434          | <a href="#">358</a>       |
| 6<br>(-)          | Cryptococcus gattii RV54130 CBS                    | 1.294          | <a href="#">292817</a>    |
| 7<br>(-)          | Mycobacterium pyrenivorans DSM 44605T DSM b        | 1.285          | <a href="#">127740795</a> |
| 8<br>(-)          | Lactobacillus vini DSM 20605T DSM                  | 1.283          | <a href="#">238015</a>    |
| 9<br>(-)          | Pseudarthrobacter oxydans DSM 20119T DSM           | 1.268          | <a href="#">1671</a>      |
| 10<br>(-)         | <a href="#">Bacillus cohnii DSM 6307T DSM</a>      | 1.245          | <a href="#">33932</a>     |

**Analyte55**

Analyte Name: E7  
 Analyte Description:  
 Analyte ID: 55  
 Analyte Creation Date/Time: 2021-11-19T14:09:09.493  
 Applied MSP Library(ies):  
 Applied Taxonomy Tree: Projects, Bruker Taxonomy

| Rank<br>(Quality) | Matched Pattern                                     | Score<br>Value | NCBI<br>Identifier        |
|-------------------|-----------------------------------------------------|----------------|---------------------------|
| 1<br>(-)          | Curtobacterium flaccumfaciens DSM 20149 DSM         | 1.642          | <a href="#">2035</a>      |
| 2<br>(-)          | Curtobacterium albidum HKI 11500 HKJ                | 1.253          | <a href="#">50728</a>     |
| 3<br>(-)          | Enterococcus faecium 11037 CHB                      | 1.248          | <a href="#">1352</a>      |
| 4<br>(-)          | Lactobacillus paracasei ssp tolerans DSM 20012 DSM  | 1.234          | <a href="#">113557</a>    |
| 5<br>(-)          | Arthrobacter psychrolactophilus DSM 15612T DSM      | 1.189          | <a href="#">92442</a>     |
| 6<br>(-)          | <a href="#">Citrobacter freundii 22054_1 CHB</a>    | 1.183          | <a href="#">546</a>       |
| 7<br>(-)          | <a href="#">Proteus vulgaris (PX) 22086129 MLD</a>  | 1.152          | <a href="#">585</a>       |
| 8<br>(-)          | Lactobacillus paracasei ssp paracasei DSM 8742 DSM  | 1.152          | <a href="#">47714</a>     |
| 9<br>(-)          | Lactobacillus paracasei ssp paracasei DSM 20244 DSM | 1.145          | <a href="#">47714</a>     |
| 10<br>(-)         | Clostridium botulinum B 2293_NewZealand 75-3074_BOG | 1.137          | <a href="#">129286527</a> |

**Analyte56**

Analyte Name: E8  
 Analyte Description:  
 Analyte ID: 56  
 Analyte Creation Date/Time: 2021-11-19T14:09:10.456  
 Applied MSP Library(ies):  
 Applied Taxonomy Tree: Projects, Bruker Taxonomy

| Rank<br>(Quality) | Matched Pattern                                         | Score<br>Value | NCBI<br>Identifier     |
|-------------------|---------------------------------------------------------|----------------|------------------------|
| 1<br>(++)         | Pseudomonas savastanoi ssp savastanoi LMG 2209T HAM     | 2.292          | <a href="#">29438</a>  |
| 2<br>(++)         | Pseudomonas savastanoi ssp savastanoi LMG 5011 HAM      | 2.062          | <a href="#">29438</a>  |
| 3<br>(++)         | Pseudomonas caricapapayae LMG 2152T HAM                 | 2.021          | <a href="#">46678</a>  |
| 4<br>(+)          | 2501                                                    | 1.932          | <a href="#">451320</a> |
| 5<br>(+)          | Pseudomonas avellanae DSM 11809T DSM                    | 1.911          | <a href="#">46257</a>  |
| 6<br>(+)          | <a href="#">Pseudomonas congelans DSM 14939T HAM</a>    | 1.901          | <a href="#">200452</a> |
| 7<br>(+)          | Pseudomonas syringae ssp syringae DSM 6693 HAM          | 1.872          | <a href="#">317</a>    |
| 8<br>(+)          | 2502                                                    | 1.836          | <a href="#">451320</a> |
| 9<br>(+)          | Pseudomonas chlororaphis ssp aurantiaca CIP 106718T HAM | 1.809          | <a href="#">333</a>    |
| 10<br>(+)         | Pseudomonas agarici DSM 11810T HAM                      | 1.802          | <a href="#">46677</a>  |

**Analyte57**

Analyte Name: E9  
 Analyte Description:  
 Analyte ID: 57  
 Analyte Creation Date/Time: 2021-11-19T14:09:10.742  
 Applied MSP Library(ies):  
 Applied Taxonomy Tree: Projects, Bruker Taxonomy

| Rank<br>(Quality) | Matched Pattern                                          | Score<br>Value | NCBI<br>Identifier     |
|-------------------|----------------------------------------------------------|----------------|------------------------|
| 1<br>(+++)        | Pseudomonas savastanoi ssp savastanoi LMG 2209T HAM      | 2.304          | <a href="#">29438</a>  |
| 2<br>(++)         | Pseudomonas savastanoi ssp savastanoi LMG 5011 HAM       | 2.127          | <a href="#">29438</a>  |
| 3<br>(++)         | Pseudomonas caricapapayae LMG 2152T HAM                  | 2.089          | <a href="#">46678</a>  |
| 4<br>(+)          | <a href="#">Pseudomonas congelans DSM 14939T HAM</a>     | 1.922          | <a href="#">200452</a> |
| 5<br>(+)          | 2501                                                     | 1.897          | <a href="#">451320</a> |
| 6<br>(+)          | 2502                                                     | 1.883          | <a href="#">451320</a> |
| 7<br>(+)          | Pseudomonas syringae ssp syringae DSM 6693 HAM           | 1.858          | <a href="#">317</a>    |
| 8<br>(+)          | Pseudomonas agarici DSM 11810T HAM                       | 1.807          | <a href="#">46677</a>  |
| 9<br>(+)          | Pseudomonas avellanae DSM 11809T DSM                     | 1.711          | <a href="#">46257</a>  |
| 10<br>(+)         | Pseudomonas chlororaphis ssp chlororaphis DSM 50083T HAM | 1.708          | <a href="#">333</a>    |

**Analyte58**

Analyte Name: E10  
 Analyte Description:  
 Analyte ID: 58  
 Analyte Creation Date/Time: 2021-11-19T14:09:09.443  
 Applied MSP Library(ies):  
 Applied Taxonomy Tree: Projects, Bruker Taxonomy

| Rank<br>(Quality) | Matched Pattern                                                   | Score<br>Value | NCBI<br>Identifier     |
|-------------------|-------------------------------------------------------------------|----------------|------------------------|
| 1<br>(+++)        | <i>Pseudomonas savastanoi</i> ssp <i>savastanoi</i> LMG 2209T HAM | 2.3            | <a href="#">29438</a>  |
| 2<br>(++)         | <i>Pseudomonas savastanoi</i> ssp <i>savastanoi</i> LMG 5011 HAM  | 2.141          | <a href="#">29438</a>  |
| 3<br>(++)         | <i>Pseudomonas caricapapayae</i> LMG 2152T HAM                    | 2.033          | <a href="#">46678</a>  |
| 4<br>(+)          | <i>Pseudomonas syringae</i> ssp <i>syringae</i> DSM 6693 HAM      | 1.939          | <a href="#">317</a>    |
| 5<br>(+)          | 2501                                                              | 1.89           | <a href="#">451320</a> |
| 6<br>(+)          | <a href="#">Pseudomonas congelans DSM 14939T HAM</a>              | 1.867          | <a href="#">200452</a> |
| 7<br>(+)          | 2502                                                              | 1.833          | <a href="#">451320</a> |
| 8<br>(+)          | <i>Pseudomonas agarici</i> DSM 11810T HAM                         | 1.791          | <a href="#">46677</a>  |
| 9<br>(+)          | <i>Pseudomonas cichorii</i> DSM 50259T HAM                        | 1.777          | <a href="#">36746</a>  |
| 10<br>(+)         | <i>Pseudomonas avellanae</i> DSM 11809T DSM                       | 1.771          | <a href="#">46257</a>  |

**Analyte59**

Analyte Name: E11  
 Analyte Description:  
 Analyte ID: 59  
 Analyte Creation Date/Time: 2021-11-19T14:09:10.004  
 Applied MSP Library(ies):  
 Applied Taxonomy Tree: Bruker Taxonomy, Projects

| Rank<br>(Quality) | Matched Pattern                                                        | Score<br>Value | NCBI<br>Identifier     |
|-------------------|------------------------------------------------------------------------|----------------|------------------------|
| 1<br>(++)         | <i>Pseudomonas savastanoi</i> ssp <i>savastanoi</i> LMG 2209T HAM      | 2.244          | <a href="#">29438</a>  |
| 2<br>(++)         | <i>Pseudomonas caricapapayae</i> LMG 2152T HAM                         | 2.02           | <a href="#">46678</a>  |
| 3<br>(++)         | <i>Pseudomonas savastanoi</i> ssp <i>savastanoi</i> LMG 5011 HAM       | 2.004          | <a href="#">29438</a>  |
| 4<br>(+)          | 2501                                                                   | 1.986          | <a href="#">451320</a> |
| 5<br>(+)          | 2502                                                                   | 1.979          | <a href="#">451320</a> |
| 6<br>(+)          | <i>Pseudomonas agarici</i> DSM 11810T HAM                              | 1.867          | <a href="#">46677</a>  |
| 7<br>(+)          | <a href="#">Pseudomonas congelans DSM 14939T HAM</a>                   | 1.778          | <a href="#">200452</a> |
| 8<br>(+)          | <i>Pseudomonas syringae</i> ssp <i>syringae</i> DSM 6693 HAM           | 1.762          | <a href="#">317</a>    |
| 9<br>(+)          | <i>Pseudomonas chlororaphis</i> ssp <i>chlororaphis</i> DSM 50083T HAM | 1.736          | <a href="#">333</a>    |
| 10<br>(+)         | <i>Pseudomonas chlororaphis</i> ssp <i>aurantiaca</i> CIP 106718T HAM  | 1.728          | <a href="#">333</a>    |

**Analyte60**

Analyte Name: E12  
 Analyte Description:  
 Analyte ID: 60  
 Analyte Creation Date/Time: 2021-11-19T14:09:10.675  
 Applied MSP Library(ies):  
 Applied Taxonomy Tree: Projects, Bruker Taxonomy

| Rank<br>(Quality) | Matched Pattern                                      | Score<br>Value | NCBI<br>Identifier     |
|-------------------|------------------------------------------------------|----------------|------------------------|
| 1<br>(+++)        | Pseudomonas savastanoi ssp savastanoi LMG 2209T HAM  | 2.316          | <a href="#">29438</a>  |
| 2<br>(++)         | Pseudomonas savastanoi ssp savastanoi LMG 5011 HAM   | 2.136          | <a href="#">29438</a>  |
| 3<br>(++)         | Pseudomonas caricapapayae LMG 2152T HAM              | 2.058          | <a href="#">46678</a>  |
| 4<br>(+)          | Pseudomonas syringae ssp syringae DSM 6693 HAM       | 1.884          | <a href="#">317</a>    |
| 5<br>(+)          | <a href="#">Pseudomonas congelans DSM 14939T HAM</a> | 1.884          | <a href="#">200452</a> |
| 6<br>(+)          | 2502                                                 | 1.815          | <a href="#">451320</a> |
| 7<br>(+)          | Pseudomonas syringae ssp syringae LMG 1247T HAM      | 1.814          | <a href="#">317</a>    |
| 8<br>(+)          | 2501                                                 | 1.798          | <a href="#">451320</a> |
| 9<br>(+)          | Pseudomonas agarici DSM 11810T HAM                   | 1.774          | <a href="#">46677</a>  |
| 10<br>(+)         | Pseudomonas avellanae DSM 11809T DSM                 | 1.734          | <a href="#">46257</a>  |
