# Supplementary material for: Identification and Characterisation of Pseudomonas savastanoi pv. savastanoi as the Causal Agent of Olive Knot Disease in Croatian, Slovenian and Portuguese Olive (Olea europaea L.) Orchards
Source: Plants (Basel). 2023 Jan 9;12(2):307. doi: 10.3390/plants12020307 (PMC9865541; doi:10.3390/plants12020307)
Supplement: Supplementary file 1 [file plants-12-00307-s001.zip › Table S1. Bacteria strains isolated from olive knots in Slovenia identified using mass spectrometry.pdf]

**Table S1.** Bacteria strains isolated from olive knots in Slovenia identified with MALDI-TOF mass spectrometry.

| <b>Isolate code</b> | <b>Olive variety</b> | <b>SV*</b> | <b>Bacterium name</b>                               |
|---------------------|----------------------|------------|-----------------------------------------------------|
| F1-2                | Frantoio             | 2.309      | <i>Pseudomonas savastanoi</i> pv. <i>savastanoi</i> |
| F1-3                | Frantoio             | 2.289      | <i>Pseudomonas savastanoi</i> pv. <i>savastanoi</i> |
| F1-4                | Frantoio             | 2.257      | <i>Pseudomonas savastanoi</i> pv. <i>savastanoi</i> |
| F1-5                | Frantoio             | 2.337      | <i>Pseudomonas savastanoi</i> pv. <i>savastanoi</i> |
| F1-6                | Frantoio             | 2.334      | <i>Pseudomonas savastanoi</i> pv. <i>savastanoi</i> |
| A1-1                | Arbequina            | 2.378      | <i>Pseudomonas savastanoi</i> pv. <i>savastanoi</i> |
| A1-3                | Arbequina            | 2.316      | <i>Pseudomonas savastanoi</i> pv. <i>savastanoi</i> |
| A1-4                | Arbequina            | 2.325      | <i>Pseudomonas savastanoi</i> pv. <i>savastanoi</i> |
| A1-5                | Arbequina            | 2.263      | <i>Pseudomonas savastanoi</i> pv. <i>savastanoi</i> |
| L2-1                | Leccino              | 2.293      | <i>Pseudomonas savastanoi</i> pv. <i>savastanoi</i> |
| L2-2                | Leccino              | 2.288      | <i>Pseudomonas savastanoi</i> pv. <i>savastanoi</i> |
| L2-3                | Leccino              | 2.370      | <i>Pseudomonas savastanoi</i> pv. <i>savastanoi</i> |
| L2-4                | Leccino              | 2.315      | <i>Pseudomonas savastanoi</i> pv. <i>savastanoi</i> |
| L2-5                | Leccino              | 2.206      | <i>Pseudomonas savastanoi</i> pv. <i>savastanoi</i> |
| L6-2                | Leccino              | 2.293      | <i>Pseudomonas savastanoi</i> pv. <i>savastanoi</i> |
| L6-3                | Leccino              | 2.278      | <i>Pseudomonas savastanoi</i> pv. <i>savastanoi</i> |
| L6-4                | Leccino              | 2.335      | <i>Pseudomonas savastanoi</i> pv. <i>savastanoi</i> |
| F3-2                | Frantoio             | 2.238      | <i>Pseudomonas savastanoi</i> pv. <i>savastanoi</i> |
| F3-3                | Frantoio             | 2.294      | <i>Pseudomonas savastanoi</i> pv. <i>savastanoi</i> |
| F3-4                | Frantoio             | 2.370      | <i>Pseudomonas savastanoi</i> pv. <i>savastanoi</i> |
| F3-5                | Frantoio             | 2.243      | <i>Pseudomonas savastanoi</i> pv. <i>savastanoi</i> |
| F3-1                | Frantoio             | 2.267      | <i>Pseudomonas savastanoi</i> pv. <i>savastanoi</i> |
| L1-1                | Leccino              | 2.383      | <i>Pseudomonas savastanoi</i> pv. <i>savastanoi</i> |
| L6-5                | Leccino              | 2.308      | <i>Pseudomonas savastanoi</i> pv. <i>savastanoi</i> |
| L5-3                | Leccino              | 2.314      | <i>Pseudomonas savastanoi</i> pv. <i>savastanoi</i> |
| L5-1                | Leccino              | 2.289      | <i>Pseudomonas savastanoi</i> pv. <i>savastanoi</i> |
| L5-5                | Leccino              | 2.320      | <i>Pseudomonas savastanoi</i> pv. <i>savastanoi</i> |
| L5-4                | Leccino              | 2.257      | <i>Pseudomonas savastanoi</i> pv. <i>savastanoi</i> |
| L5-2                | Leccino              | 2.291      | <i>Pseudomonas savastanoi</i> pv. <i>savastanoi</i> |
| F4-2                | Frantoio             | 2.297      | <i>Pseudomonas savastanoi</i> pv. <i>savastanoi</i> |
| F4-1                | Frantoio             | 2.276      | <i>Pseudomonas savastanoi</i> pv. <i>savastanoi</i> |
| F4-4                | Frantoio             | 2.297      | <i>Pseudomonas savastanoi</i> pv. <i>savastanoi</i> |
| F4-3                | Frantoio             | 2.334      | <i>Pseudomonas savastanoi</i> pv. <i>savastanoi</i> |
| F4-5                | Frantoio             | 2.178      | <i>Pseudomonas savastanoi</i> pv. <i>savastanoi</i> |
| L4-1                | Leccino              | 2.291      | <i>Pseudomonas savastanoi</i> pv. <i>savastanoi</i> |
| L4-2                | Leccino              | 2.26       | <i>Pseudomonas savastanoi</i> pv. <i>savastanoi</i> |
| L4-5                | Leccino              | <0         | No ID                                               |
| L4-4                | Leccino              | 2.265      | <i>Pseudomonas savastanoi</i> pv. <i>savastanoi</i> |
| L4-3                | Leccino              | 2.256      | <i>Pseudomonas savastanoi</i> pv. <i>savastanoi</i> |
| L6-1                | Leccino              | 2.278      | <i>Pseudomonas savastanoi</i> pv. <i>savastanoi</i> |
| F2-2                | Frantoio             | 2.369      | <i>Pseudomonas savastanoi</i> pv. <i>savastanoi</i> |
| F2-4                | Frantoio             | 2.283      | <i>Pseudomonas savastanoi</i> pv. <i>savastanoi</i> |
| F2-5                | Frantoio             | 2.351      | <i>Pseudomonas savastanoi</i> pv. <i>savastanoi</i> |
| F2-3                | Frantoio             | 2.347      | <i>Pseudomonas savastanoi</i> pv. <i>savastanoi</i> |
| F2-1                | Frantoio             | 2.228      | <i>Pseudomonas savastanoi</i> pv. <i>savastanoi</i> |
| At1-2               | Ascolana tenera      | 2.357      | <i>Pseudomonas savastanoi</i> pv. <i>savastanoi</i> |
| At1-5               | Ascolana tenera      | 2.325      | <i>Pseudomonas savastanoi</i> pv. <i>savastanoi</i> |
| At1-1               | Ascolana tenera      | 2.321      | <i>Pseudomonas savastanoi</i> pv. <i>savastanoi</i> |

|       |                 |       |                                                     |
|-------|-----------------|-------|-----------------------------------------------------|
| At1-4 | Ascolana tenera | 2.289 | <i>Pseudomonas savastanoi</i> pv. <i>savastanoi</i> |
| I1-5  | Itrana          | 1.599 | <i>Curtobacterium flaccumfaciens</i> DSM 20149 DSM  |
| At1-3 | Ascolana tenera | 2.361 | <i>Pseudomonas savastanoi</i> pv. <i>savastanoi</i> |
| I1-4  | Itrana          | 1.604 | <i>Curtobacterium flaccumfaciens</i> DSM 20149 DSM  |
| I1-3  | Itrana          | 1.688 | <i>Curtobacterium flaccumfaciens</i> DSM 20149 DSM  |
| I1-2  | Itrana          | 2.391 | <i>Bacillus megaterium</i>                          |
| I1-1  | Itrana          | 1.642 | <i>Curtobacterium flaccumfaciens</i> DSM 20149 DSM  |
| At2-6 | Ascolana tenera | 2.292 | <i>Pseudomonas savastanoi</i> pv. <i>savastanoi</i> |
| At2-1 | Ascolana tenera | 2.304 | <i>Pseudomonas savastanoi</i> pv. <i>savastanoi</i> |
| At2-3 | Ascolana tenera | 2.300 | <i>Pseudomonas savastanoi</i> pv. <i>savastanoi</i> |
| At2-4 | Ascolana tenera | 2.244 | <i>Pseudomonas savastanoi</i> pv. <i>savastanoi</i> |
| At2-5 | Ascolana tenera | 2.316 | <i>Pseudomonas savastanoi</i> pv. <i>savastanoi</i> |

\*Score value (SV) means; 2.000–3.000: highly probable species identification, 1.700–1.999: secure genus identification, probable species identification; 0.000–1.699: not reliable identification.
