# Supplementary material for: Identification and Characterisation of Pseudomonas savastanoi pv. savastanoi as the Causal Agent of Olive Knot Disease in Croatian, Slovenian and Portuguese Olive (Olea europaea L.) Orchards
Source: Plants (Basel). 2023 Jan 9;12(2):307. doi: 10.3390/plants12020307 (PMC9865541; doi:10.3390/plants12020307)
Supplement: Supplementary file 1 [file plants-12-00307-s001.zip › Table S2. Characterisation of molecularly identified Pss isolates.pdf]

**Table S2.** Characterisation of molecularly identified *Pss* isolates from Slovenian, Croatian and Portuguese olive orchards\*.

| Country  | Isolate code | Olive variety     | Fluorescence on KB | Levan production | Oxidase activity | Pectolytic activity | Arginin dihydrolase activity | Tobacco hypersensitive reaction |
|----------|--------------|-------------------|--------------------|------------------|------------------|---------------------|------------------------------|---------------------------------|
| Croatia  | V4B          | Buža              | -                  | -                | -                | -                   | -                            | -                               |
|          | V4P          | Pendolino         | +                  | -                | -                | -                   | -                            | -                               |
|          | V7K          | Karbonaca         | -                  | -                | -                | -                   | -                            | +                               |
|          | V9B          | Buža              | -                  | -                | -                | -                   | -                            | +                               |
|          | R12L         | Leccino           | +                  | -                | -                | -                   | -                            | +                               |
|          | P15TR        | Italian rosinjola | +                  | -                | -                | -                   | -                            | +                               |
|          | P15N         | Nocciara          | +                  | -                | -                | -                   | -                            | +                               |
|          | B17L         | Leccino           | -                  | -                | -                | -                   | -                            | +                               |
|          | B19F         | Frantoio          | +                  | -                | -                | -                   | -                            | +                               |
|          | B19L         | Leccino           | -                  | -                | -                | -                   | -                            | +                               |
|          | B19P         | Pendolino         | +                  | -                | -                | -                   | -                            | +                               |
|          | B21F         | Frantoio          | +                  | -                | -                | -                   | -                            | +                               |
|          | B21L         | Leccino           | -                  | -                | -                | -                   | -                            | +                               |
|          | B23F         | Frantoio          | -                  | -                | -                | -                   | -                            | +                               |
|          | 16L          | Leccino           | +                  | -                | -                | -                   | -                            | +                               |
|          | 17L          | Leccino           | -                  | -                | DP               | -                   | -                            | +                               |
|          | NIN          | Unknown           | -                  | -                | -                | -                   | -                            | +                               |
|          | U26F         | Frantoio          | -                  | -                | -                | -                   | -                            | +                               |
|          | U27L         | Leccino           | -                  | -                | -                | -                   | -                            | +                               |
|          | VS28L        | Leccino           | -                  | -                | DP               | -                   | -                            | +                               |
|          | VS28N        | Unknown           | -                  | -                | DP               | -                   | -                            | +                               |
|          | VS29L        | Leccino           | -                  | -                | DP               | -                   | -                            | +                               |
|          | VS31L        | Leccino           | -                  | -                | -                | -                   | -                            | +                               |
|          | R34F         | Frantoio          | -                  | -                | -                | -                   | -                            | +                               |
|          | BR37L        | Leccino           | -                  | -                | -                | -                   | -                            | +                               |
|          | N40M         | Maurino           | -                  | -                | -                | -                   | -                            | +                               |
|          | N41F         | Frantoio          | -                  | -                | -                | -                   | -                            | +                               |
|          | N42F         | Frantoio          | -                  | -                | -                | -                   | -                            | +                               |
|          | N43L         | Leccino           | -                  | -                | -                | -                   | -                            | +                               |
|          | N43P         | Pendolino         | -                  | -                | -                | -                   | -                            | +                               |
|          | P44F         | Frantoio          | -                  | -                | +                | -                   | -                            | +                               |
|          | B45C-PR      | Porečka rosulja   | +                  | -                | +                | -                   | -                            | +                               |
| Slovenia | F1-2         | Frantoio          | +                  | -                | DP               | -                   | -                            | +                               |
|          | F1-3         | Frantoio          | +                  | -                | DP               | -                   | -                            | +                               |
|          | F1-5         | Frantoio          | +                  | -                | DP               | -                   | -                            | +                               |
|          | A1-1         | Arbequina         | +                  | -                | DP               | -                   | -                            | +                               |
|          | A1-3         | Arbequina         | +                  | -                | DP               | -                   | -                            | +                               |
|          | A1-4         | Arbequina         | +                  | -                | DP               | -                   | -                            | +                               |
|          | L2-1         | Leccino           | +                  | -                | DP               | -                   | -                            | +                               |
|          | L2-3         | Leccino           | +                  | -                | DP               | -                   | -                            | +                               |
|          | L6-2         | Leccino           | +                  | -                | -                | -                   | -                            | +                               |
|          | L6-4         | Leccino           | +                  | -                | DP               | -                   | -                            | +                               |
|          | F3-2         | Frantoio          | +                  | -                | DP               | -                   | -                            | +                               |
|          | F3-4         | Frantoio          | +                  | -                | DP               | -                   | -                            | +                               |
|          | F3-5         | Frantoio          | +                  | -                | DP               | -                   | -                            | +                               |
|          | L1-1         | Leccino           | +                  | -                | +                | -                   | -                            | +                               |
|          | L5-3         | Leccino           | +                  | -                | DP               | -                   | -                            | +                               |

|                 |       |                    |   |   |    |   |   |   |
|-----------------|-------|--------------------|---|---|----|---|---|---|
|                 | L5-1  | Leccino            | + | - | -  | - | - | + |
|                 | L5-4  | Leccino            | + | - | DP | - | - | + |
|                 | F4-2  | Frantoio           | + | - | -  | - | - | + |
|                 | F4-1  | Frantoio           | + | - | +  | - | - | + |
|                 | F4-4  | Frantoio           | + | - | +  | - | - | + |
|                 | L4-1  | Leccino            | + | - | DP | - | - | + |
|                 | L4-4  | Leccino            | + | - | DP | - | - | + |
|                 | L6-1  | Leccino            | + | - | DP | - | - | + |
|                 | F2-2  | Frantoio           | + | - | DP | - | - | + |
|                 | F2-5  | Frantoio           | + | - | DP | - | - | + |
|                 | At1-2 | Ascolana<br>tenera | + | - | DP | - | - | + |
|                 | At1-5 | Ascolana<br>tenera | + | - | DP | - | - | + |
|                 | At1-4 | Ascolana<br>tenera | + | - | DP | - | - | + |
|                 | At2-6 | Ascolana<br>tenera | + | - | DP | - | - | + |
|                 | At2-4 | Ascolana<br>tenera | + | - | -  | - | - | + |
| <b>Portugal</b> | PT15  | Cordovil           | + | - | -  | - | - | + |
|                 | PT17  | Madural            | + | - | -  | - | - | + |

\*+ = positive; - = negative; DP = delayed positive.
